# Supplementary material
Source: HighWire-hosted journal article supplement (http://cmajopen.ca/highwire/filestream/81251/field_highwire_adjunct_files/1/2019-0137-original-submission.pdf)
Supplement: 2019-0137-original-submission.pdf [file 2019-0137-original-submission.pdf]

# Circadian Rhythm – A Neglected Aspect of the Post-Concussion Insomnia Assessment

A Cross-sectional, Observational Study

## Authors:

1. Dora M. Zalai, MD, PhD, Ryerson University
2. Todd A. Girard, PhD, Ryerson University
3. Michael D. Cusimano, MD, PhD, St. Michael's Hospital, University of Toronto
4. Colin M. Shapiro, MBBCh, PhD, University of Toronto & Youthdale Child and Adolescent Sleep Centre

Corresponding author's e-mail: [dora.zalai@psych.ryerson.ca](mailto:dora.zalai@psych.ryerson.ca)

**Funding:** Dora Zalai's research was supported by the Canadian Institutes of Health Research Frederick Banting and Charles Best Canada Graduate Scholarship Award and the Youthdale Foundation. Dr. Cusimano's work was supported by the Canadian Institutes of Health Research Strategic Team Grant in Applied Injury Research # TIR-103946 and the Ontario Neurotrauma Foundation.

**Competing Interests:** The authors have no potential conflict of interest to disclose.

## Abstract

**Background:** Insomnia is a major predictor of adverse outcomes in mild traumatic brain injury (mTBI), including concussion. Insomnia symptoms may be maintained by circadian rhythm sleep-wake disorders (CRSWD). While previous studies have focused on insomnia symptom assessment, we provide a diagnostic circadian workup in a homogeneous sample of patients with chronic insomnia symptoms following a mTBI. Detection and treatment CRSWD may open a new avenue to facilitate recovery from mTBI. Objective: To determine the prevalence of CRSWD in individuals with chronic insomnia following a mTBI.

**Methods:** Individuals with mTBI (Glasgow Coma Scale 13-15) and chronic insomnia (Insomnia Severity Index > 11 and assessed in a clinical interview) were recruited from diverse community clinics 3 - 24 months post-injury to participate in this cross-sectional observational study. Potential participants (n = 81) were screened by phone and participated in an intake clinical interview (n = 62) before enrollment (n = 50). Exclusion criteria: (a) alcohol/ substance use problems; (b) pre-existing brain disorders/previous neurosurgery; (c) travelled across more than two time zones less than three weeks prior to the screening; (d) shift work schedule. Assessments (clinical interview, standard questionnaire; 2 weeks of actigraphy and sleep diary and dim light melatonin onset test) were conducted in a sleep and circadian clinic. Outcome measure: Percentage of patients with CRSWD.

**Results:** Among the 50 participants, (median age: 39.5 – IQR 23.8; 64% females) 26% had a CRSWD. The most common (77%) circadian diagnosis was delayed sleep-wake phase disorder.

**Interpretation:** The prevalence of CRSWD is exceptionally high among individuals with chronic insomnia symptoms following a mTBI. Accurate diagnosis and treatment of these

1  
2  
3 disorders may improve the post-concussion recovery of approximately a quarter of all patients  
4  
5 and half of adolescents and young adults who suffer from chronic insomnia following a mTBI.  
6  
7  
8  
9  
10  
11  
12  
13  
14  
15  
16  
17  
18  
19  
20  
21  
22  
23  
24  
25  
26  
27  
28  
29  
30  
31  
32  
33  
34  
35  
36  
37  
38  
39  
40  
41  
42  
43  
44  
45  
46  
47  
48  
49  
50  
51  
52  
53  
54  
55  
56  
57  
58  
59  
60

Confidential

1  
2  
3 Traumatic brain injury (TBI) – a brain trauma caused by an external mechanical force - is  
4 the leading cause of disability among young adults and has rising incidence rate in Canada,  
5 especially in the 18-34 age group (1, 2). Mild TBI (mTBI) - including concussion - constitute  
6 the majority (70-90%) of all treated TBI cases and has the largest contribution to the burden of  
7 injury-related disability (3). Early detection and effective management of medical conditions that  
8 hinder recovery could prevent disability and substantially reduce societal costs.  
9  
10  
11  
12  
13  
14  
15  
16

17 Difficulties with falling asleep, staying asleep or early morning final awakening  
18 (insomnia) are the most common persistent sleep symptoms after mTBI, including concussion (4,  
19 5). Insomnia after concussion worsens fatigue, pain, cognition and mood and predicts poor  
20 overall prognosis for recovery (6-8). Since the disorders of sleep and wakefulness that cause  
21 chronic insomnia symptoms can be effectively treated, it becomes important to characterize and  
22 diagnose the sleep disorders that maintain insomnia symptoms after mTBI. Effective treatment  
23 of these disorders holds the promise of improving the management of persistent post-concussive  
24 symptoms and hastening recovery from mTBI.  
25  
26  
27  
28  
29  
30  
31  
32  
33  
34

35 Chronic insomnia is a shared symptom of circadian rhythm sleep-wake disorders; see  
36 Table 1. These disorders arise if there is a disruption of the endogenous circadian system or a  
37 misalignment between the internal circadian rhythm and the external environment. The best  
38 biological marker of circadian rhythm sleep-wake disorders is abnormal dim light melatonin  
39 onset (DLMO), while the behavioural diagnostic feature is that sleep phase is significantly  
40 delayed, advanced or irregular relative to environmental time and social norms.  
41  
42  
43  
44  
45  
46  
47  
48

49 A neuroimaging study suggests that mTBI may cause pineal gland injury and disrupt  
50 circadian regulation via its effect on melatonin secretion (9). Only one clinical study has  
51 performed diagnostic circadian assessment in a group of patients with mTBI hitherto (10). This  
52  
53  
54  
55  
56  
57  
58  
59  
60

1  
2  
3 study selected 15 individuals from 42 sleep clinic patients with mTBI and insomnia; however,  
4  
5 selection criteria were not provided; DLMOs were not reported; time since injury was not  
6  
7 specified, and the age range was restricted to young and early-middle age adults. Each of the 15  
8  
9 patients was diagnosed with a circadian rhythm sleep-wake disorder - 7 with delayed sleep-wake  
10  
11 phase disorder and 6 with irregular sleep-wake rhythm disorder. These results suggest that the  
12  
13 prevalence of circadian rhythm sleep-wake disorders may be higher among mTBI patients with  
14  
15 chronic insomnia symptoms than the known prevalence in relevant comparisons groups (i.e.  
16  
17 sleep clinic insomnia samples) but the above shortcomings limit the interpretability of the above  
18  
19 results.  
20  
21  
22  
23

24         Given that circadian rhythm sleep-wake disorders require specific circadian assessment  
25  
26 and treatment, it is pertinent to establish if patients with mTBI and insomnia symptoms comprise  
27  
28 one of the few clinical groups where circadian rhythm sleep-wake disorders are prevalent. If this  
29  
30 is the case, circadian assessment and treatment becomes an important part of chronic insomnia  
31  
32 work-up and management following mTBI.  
33  
34

### 35 **Objective and Hypothesis**

36  
37         The objective was to determine the rate of circadian rhythm sleep-wake disorders  
38  
39 according to standard diagnostic criteria using evidence-based comprehensive assessment –  
40  
41 including actigraphy and DLMO - in a large consecutive and representative sample of  
42  
43 individuals with chronic insomnia following mTBI. The hypothesis was that circadian rhythm  
44  
45 sleep-wake disorders would be more common in this clinical group than it is in individuals who  
46  
47 seek treatment for chronic insomnia in sleep clinics (5-10%) (11).  
48  
49  
50  
51  
52  
53  
54  
55  
56  
57  
58  
59  
60

## Method

**Participants.** Participant characteristics are summarized in Table 2. Inclusion criteria: (a) mTBI (Glasgow Coma Score  $\geq 13$  at the time of injury) three to 24 months prior to the screening assessment; (b) chronic insomnia symptoms that started or significantly amplified following the injury; (c) age between 17 and 65 years. When participants had multiple concussions, the mTBI after which the sleep problem started was in the time frame of three to 24 months. Exclusion criteria: (a) had alcohol or other substance use problems within three months prior to enrollment based on DSM 5 criteria; (b) needed immediate psychiatric help based on in-person assessment; (c) had pre-existing brain disorders or neurosurgery; (d) had travelled across more than two time zones less than three weeks prior to the phone screening; or (e) had a shift work schedule.

**Procedures.** Information of the study was distributed widely to hospitals and community clinics in South Ontario, in the Georgian Bay and Sudbury areas and it was published on brain injury organization and sleep clinic websites (Referral sources are summarized in Table 2). We received 81 referrals within the 12-month recruitment phase. Following phone screens, a semi-structured interview and completion of the Insomnia Severity Index, however, 22 were ineligible. Another 5 had scheduling or assessment conflicts, and four failed to show in person. Nobody needed to be excluded for reasons of shift work, travel across time zones or psychiatric conditions (Figure 1). Thus, final enrollment comprised 50 patients with mTBI and chronic insomnia symptoms. In the subsequent 12-14 days after their enrollment, participants kept a sleep diary and wore an actiwatch on their non-dominant wrist. Finally, they participated in a DLMO test in 12-14 days following their initial interview.

### Assessment tools and methods.

Insomnia Assessment:

1  
2  
3 The *Duke Structured Interview for Sleep Disorders* (DSISD) assesses sleep disorders  
4 according to clinical and research diagnostic criteria (12). The study used an updated version of  
5 the DSISD in which the insomnia section has been modified to match the new DSM 5 criteria.  
6  
7 The DSISD was used to select individuals with chronic insomnia.  
8  
9

10  
11  
12 The *Insomnia Severity Index* (ISI; Morin, 1993) measures the subjective severity of  
13 insomnia symptoms (13, 14). The degree of insomnia severity is determined by the summary  
14 scores of seven items as follows: 0 to 7 -no clinical insomnia; 8 to 14- “sub-threshold” insomnia;  
15 15 to 21 -moderate insomnia; and 22 to 28 is severe insomnia. A summary score of 11 has been  
16 recommended as a cut-off for screening for clinical insomnia research and was used as cut-off  
17 for inclusion in this study (15).  
18  
19  
20  
21  
22  
23  
24  
25

#### 26 Assessment of sleep pattern:

27  
28 *Wrist Actigraphy* is a recommended diagnostic assessment tool for circadian rhythm sleep-wake  
29 disorders (11). Participants wore a Philips Respironics Actiwach 2 on their non-dominant wrist  
30 (16). The device detects movement using a solid piezoelectric accelerometer with 0.35-7.5Hz  
31 bandwidth and 0.5-2G peak value. The device was set to record 30-second epochs at medium  
32 sensitivity to detect wake threshold. Data were scored both automatically and manually. Manual  
33 scoring involved setting the “rest period” (the period between bedtime and rise time). Rest time  
34 was set based on event markers (participants marked their bedtime and rise time using the event  
35 marker function of the actiwatch) as well as movement, light and sleep diary data. After the rest  
36 periods were set, the Actiware 6.0.7. software calculated all the sleep parameters, including sleep  
37 onset latency, wake after sleep onset, total sleep time and sleep efficiency.  
38  
39  
40  
41  
42  
43  
44  
45  
46  
47  
48  
49  
50  
51  
52  
53  
54  
55  
56  
57  
58  
59  
60

1  
2  
3 The *Consensus Sleep Diary* was developed to provide a standard sleep log based on  
4 patients' input and expert consensus (17). The sleep indices in the Consensus Sleep Diary  
5 differentiate between individuals with insomnia and good sleepers and are significantly  
6 correlated with the ISI and with actigraphy measures (18). The diary was used in the study for  
7 longitudinal subjective assessment of sleep pattern.  
8  
9

10  
11  
12  
13  
14  
15 Assessment of circadian phase:

16  
17 *Dim Light Melatonin Onset Test (DLMO) Test.* Eight saliva samples were collected from  
18 each participant according to standard procedures (Buhlmann EK DSM © Saliva Melatonin  
19 ELISA kit; Buhlmann Laboratories, Switzerland). Light level was maximum 10 lux in the room.  
20  
21 The three baseline samples were taken every 30 minutes and the remaining samples were  
22 collected hourly. Data collection started six hours before habitual bedtime, which was  
23 determined based on participants' self-report and was verified from their sleep-diary data.  
24  
25 Medications that influence melatonin levels were prohibited/discontinued before the test.  
26  
27  
28  
29  
30  
31  
32

33 All assessors (except for the first author) were blind to the study hypothesis.  
34

35 **Missing data.** Two participants had missing actigraphy data but both provided sleep diary data  
36 that could be used to determine if they had a normal sleep phase. Altogether, 47 of the 50  
37 participants completed the DLMO test. DLMO could not be precisely determined from five  
38 samples (in three DLMO was outside of the measurement period and there were technical  
39 problems with two samples).  
40  
41  
42  
43  
44  
45

## 46 47 **Analyses**

48  
49 Saliva samples were frozen and analyzed using enzyme-linked immunosorbent assay as  
50 per manufacturer's instructions (Buhlmann EK DSM © Saliva Melatonin ELISA kit; Buhlmann  
51 Laboratories, Switzerland). The intra-assay and inter-assay coefficients of variation were 7.62  
52  
53  
54  
55  
56  
57  
58  
59  
60



1  
2  
3 and 8.88. As per consensus guidelines, DLMO was determined as the clock time, when the  
4 melatonin concentration reached and remained above the threshold (two *SD* above the baseline  
5 or, when there were fewer than 3 baseline values, an absolute value of 3 pg/ml), (19).  
6  
7

8  
9  
10 Descriptive statistics summarized the sample characteristics, questionnaire scores, the  
11 frequency of circadian rhythm sleep-wake disorders diagnoses and the relationship between  
12 circadian rhythm sleep-wake disorders diagnoses and demographic data. Independent samples t  
13 tests, using bootstrapping with 1000 re-samples compared the sleep diary and DLMO data of  
14 patients with delayed sleep-wake phase disorder and those without circadian rhythm sleep-wake  
15 disorders (there were not enough individuals in the other sub-groups of circadian rhythm sleep-  
16 wake disorders to allow statistical comparisons). Statistical significance was set at  $p \leq .008$  to  
17 correct for multiple comparisons.  
18  
19

20  
21  
22 Circadian rhythm sleep-wake disorders were diagnosed according to International  
23 Classification of Sleep Disorders (ICSD 3) criteria (11). The 95% confidence intervals (CIs) for  
24 the prevalence rates are based the corresponding precision afforded by our final sample size  
25 (N=50), (20).  
26  
27

## 28 29 30 31 32 33 34 35 36 37 38 **Results**

39  
40 Most ( $N = 46$  or 92%) participants had moderate/severe insomnia symptoms ( $ISI \geq 15$ ),  
41 while the remaining patients reported mild insomnia symptoms. Three quarters of the sample  
42 denied having subjective sleep problems or sleep disorders prior to their injury and 100%  
43 reported moderate or significant worsening of their sleep since the injury.  
44  
45  
46  
47  
48

49 One-quarter (13 patients) of the 50 participants received a circadian rhythm sleep-wake  
50 disorder diagnosis (Table 3), corresponding to a prevalence of  $26\% \pm 12\%$ . The most common  
51 diagnosis (10 patients) was delayed sleep-wake phase disorder; nine of these individuals were  
52  
53  
54  
55  
56  
57  
58  
59  
60

1  
2  
3 younger than 32 years (Table 4). All of those with advanced sleep-wake phase disorder and  
4  
5 irregular sleep-wake rhythm disorder were over 40.  
6

7  
8 There were large and significant differences both in the subjective behavioural (sleep  
9  
10 diary) and objective, biological (DLMO) timing of sleep and circadian rhythm between patients  
11  
12 with delayed sleep-wake phase disorder and those without a circadian rhythm sleep-wake  
13  
14 disorder (Table 5), confirming that the clinical diagnoses accurately separated patients with  
15  
16 delayed sleep-wake phase disorder from those without a circadian disorder.  
17  
18

### 19 **Interpretation**

20  
21 The objective of this study was to determine what percentage of patients whose main  
22  
23 sleep symptom is chronic insomnia following a mTBI have a circadian rhythm sleep-wake  
24  
25 disorder. The results supported the a-priori hypothesis: 26 % of the full sample received a  
26  
27 circadian rhythm sleep-wake disorder diagnosis.  
28  
29

30  
31 Most (77%) of these participants had delayed sleep-wake phase disorder. This proportion  
32  
33 is one-two orders of magnitude higher than the prevalence of delayed sleep-wake phase disorder  
34  
35 in the general population (0.17% – 1.53%) and over three times that among patients with chronic  
36  
37 insomnia treated at sleep clinics (6.7 %) (21-23). Notably, delayed sleep-wake phase disorder  
38  
39 was the most common sleep disorder diagnosis in the 18-31 age group with a 10-fold prevalence  
40  
41 compared to the prevalence of delayed sleep-wake phase disorder in the general adolescent  
42  
43 population (11, 24-26).  
44  
45

46  
47 This study did not explore the causes of delayed sleep-wake phase disorder but several  
48  
49 etiological factors merit consideration. One MRI study noted that patients who had sleep  
50  
51 problems following a mTBI had a longer tentorium and a flatter tentorial angle than patients who  
52  
53 did not have sleep problems. The authors speculated that the pineal gland (the secretion site of  
54  
55  
56  
57  
58  
59  
60

1  
2  
3 melatonin) would be impacted by injuries caused by an anterior – posterior force in individuals  
4  
5 with this anatomical predisposition (27).  
6

7  
8 Another biological predisposing factor could be a susceptibility of the sleep and circadian  
9  
10 system for phase delay due to a long circadian period, heightened responsiveness to the  
11  
12 melatonin suppressing effect of light in the evening; or slow accumulation and dissipation of  
13  
14 homeostatic sleep drive – mechanisms that have been implicated in the etiology of delayed  
15  
16 sleep-wake phase disorder (28). If the social demand to wake up early in the morning lessens  
17  
18 during the post injury recovery period, the sleep phase follows the circadian signals and shifts to  
19  
20 later hours in individuals with a predisposition for phase delay. This can lead to a vicious cycle,  
21  
22 in which longer light exposure in the evening and lack of light exposure in the morning further  
23  
24 delays the circadian cycle (29).  
25  
26  
27

28  
29 It is also possible that individuals with a pre-injury delayed DLMO or evening  
30  
31 chronotype are at an increased risk for sustaining a TBI, because they are sleepy in the morning  
32  
33 when they attend sport training, school or work. Athletic performance fluctuates across the  
34  
35 circadian cycle and excessive sleepiness impacts cognitive performance and increases the risk for  
36  
37 accidents and injuries (30-36). Thus, the high prevalence of delayed sleep-wake phase disorder  
38  
39 in mTBI/concussion samples may, in part, reflect a higher prevalence of TBI among individuals  
40  
41 with a late DLMO and evening chronotype.  
42  
43  
44

45  
46 Two participants in this study received a diagnosis of advanced sleep-wake phase  
47  
48 disorder. The prevalence of advanced sleep-wake phase disorder is very low both in the general  
49  
50 population or in clinical insomnia samples, given that only individual cases and family cohorts  
51  
52 have been described thus far (11, 22). In the current study, none of the participants with  
53  
54  
55  
56  
57  
58  
59  
60

1  
2  
3 advanced sleep-wake phase disorder had a family history of advanced sleep-wake phase  
4  
5 disorder.  
6

7  
8 Finally, one participant was diagnosed with irregular sleep-wake rhythm disorder. This  
9  
10 circadian rhythm sleep-wake disorder has previously been described among individuals with  
11  
12 brain pathology (11). The person in the present study with irregular sleep-wake rhythm disorder  
13  
14 reportedly had an alcohol use disorder until six months before the injury. There is an interaction  
15  
16 between the circadian system and alcohol use disorders and it is possible that pre-injury alcohol  
17  
18 use disorder increases the risk for developing an irregular sleep-wake rhythm disorder following  
19  
20 a brain injury (37).  
21  
22

23  
24 **Clinical implications.** Awareness of circadian rhythm sleep-wake disorders is generally  
25  
26 low among clinicians but distinguishing it from insomnia disorder is crucial since the treatment  
27  
28 of insomnia disorder (cognitive behavioural therapy or selected hypnotic medications) and the  
29  
30 management of circadian rhythm sleep-wake disorders (melatonin and bright light therapy) are  
31  
32 fundamentally different.  
33  
34

35  
36 The results of this study suggest that clinicians should be attentive to symptoms of  
37  
38 circadian rhythm sleep-wake disorders when they see patients with persistent insomnia  
39  
40 symptoms following a mTBI, including concussion. Referral for a circadian assessment is  
41  
42 warranted if there is a significant shift of the sleep period or if the patient sleeps only for short  
43  
44 (maximum 4 hour) periods around the clock. The threshold for referring to a circadian  
45  
46 assessment should be especially low if a teenager or young adult reports significant sleep onset  
47  
48 insomnia or a delay of sleep phase following a mTBI.  
49  
50

51  
52 This study is the first to provide a rigorous multi-method diagnostic circadian assessment  
53  
54 based on standard criteria in a representative sample of patients with mTBI and chronic  
55  
56  
57  
58  
59  
60

1  
2  
3 insomnia. Previous circadian studies have included patients with moderate and severe TBI;  
4 assessed melatonin secretion without determining DLMO; or determined average DLMO in a  
5 group of patients without providing diagnostic assessment and interpretation in samples that  
6 were substantially smaller than the current sample (4, 10, 38-42). The standard clinical intake  
7 assessment at least three months after the TBI ensured that a homogeneous sample of individuals  
8 with chronic insomnia symptoms were included.  
9

10  
11  
12 In addition to the strengths of this study, some limitations should be considered. Firstly,  
13 the sample may over-represent patients who were distressed by their insomnia symptoms. At the  
14 same time, these are the patients who (ideally) would receive some form of post-concussion  
15 sleep assessment in the community. Secondly, individuals with substance use disorders and shift  
16 workers were not recruited. It is likely that the frequency of circadian rhythm sleep-wake  
17 disorders is higher in those groups. Also, participants may not have reported insomnia symptoms  
18 that pre-dated the injury. This does not bias the diagnoses but precludes inferences about the  
19 possible role of the injury.  
20  
21  
22  
23  
24  
25  
26  
27  
28  
29  
30  
31  
32  
33  
34

35 The results of this study apply to treatment seeking patients with chronic insomnia  
36 symptoms who had a mTBI between three months and 24 months before the sleep assessment.  
37 The percentage of circadian rhythm sleep-wake disorders may be different among individuals  
38 who do experience insomnia symptoms following the TBI, but who do not seek help in  
39 managing post-concussion or sleep symptoms, or who had a TBI more than two years before a  
40 sleep assessment.  
41  
42  
43  
44  
45  
46  
47  
48

49 The current sample size was limited by logistical constraints and this hampered the  
50 precision of the estimated prevalence rates; this was particularly true for the subsample analyses  
51 regarding specific circadian rhythm sleep-wake disorders and those within young and older age  
52  
53  
54  
55  
56  
57  
58  
59  
60

1  
2  
3 groups. Future studies should assess circadian rhythm sleep-wake disorders in larger mTBI  
4  
5 samples with insomnia. Finally, this study did not include an age and sex-matched comparison  
6  
7 group of patients with chronic insomnia who did not have a history of TBI. Future replication of  
8  
9 this study will benefit from an inclusion of such groups to allow for more direct comparison of  
10  
11 rates and on the sleep-wake measures. Given that research on circadian rhythm sleep-wake  
12  
13 disorders among patients with insomnia alone is limited, these studies will add valuable  
14  
15 information not only for those with TBI, but also to the general insomnia and circadian rhythm  
16  
17 sleep-wake disorder literature.  
18  
19  
20

21  
22 It is important to emphasise that the current study did not aim to establish a cause and  
23  
24 effect relationship between the clinical diagnoses and the injury or control for variables that may  
25  
26 have influenced this relationship. We took a rigorous clinical approach because there is a need to  
27  
28 generate reliable diagnostic information which can inform clinical guidelines for insomnia  
29  
30 assessment in this clinical group. Without clinical guidelines that are based on research evidence,  
31  
32 patients with insomnia will not receive evidence-based insomnia assessment and treatment  
33  
34 after a concussion. The results of this study have direct clinical implications in that they draw  
35  
36 attention to the need to assess circadian rhythm sleep-wake disorders in patients who suffer from  
37  
38 chronic insomnia following a mTBI. Circadian assessment is currently not part of a standard  
39  
40 post-concussion insomnia workup and is not a routine component of sleep clinic assessments.  
41  
42 Consequently approximately 25% of patients with post-concussion chronic insomnia symptoms  
43  
44 (based on the results of the current study) would not receive an appropriate diagnosis and thereby  
45  
46 tailored treatment for their sleep difficulty which in turn leads to lower likelihood of recovery (6-  
47  
48 8). Future longitudinal studies should identify factors that predispose individuals for developing  
49  
50 circadian rhythm sleep-wake disorders after a concussion and test the nature and direction of  
51  
52  
53  
54  
55  
56  
57  
58  
59  
60

1  
2  
3 pathways between the circadian timing of sleep and wakefulness and factors that may influence  
4 this relationship in mTBI in different age groups.  
5  
6

7  
8 **Summary and Conclusions.** One quarter of treatment-seeking individuals with post-  
9 concussion chronic insomnia symptoms were diagnosed with a circadian rhythm sleep-wake  
10 disorder. This implies that clinicians may include circadian rhythm sleep-wake disorders in their  
11 diagnostic algorithm and consider the potential benefits of a circadian assessment when patients  
12 report insomnia symptoms and a significant change in their sleep phase following a mTBI. The  
13 majority of these patients were adolescents and young adults with approximately 50% prevalence  
14 of delayed phase sleep-wake disorder in this age group; this finding warrants larger-scale  
15 replication. Given that insomnia symptoms are major predictors of poor post-concussion  
16 recovery, detection and effective management of circadian rhythm sleep-wake disorders may  
17 improve the recovery particularly in adolescents and young adults who suffer from chronic  
18 insomnia following a mTBI.  
19  
20  
21  
22  
23  
24  
25  
26  
27  
28  
29  
30  
31  
32  
33  
34  
35  
36  
37  
38  
39  
40  
41  
42  
43  
44  
45  
46  
47  
48  
49  
50  
51  
52  
53  
54  
55  
56  
57  
58  
59  
60

### Author Contributions

1. Dora M. Zalai made substantial contributions to conception and design of the work, as well as to the acquisition, analysis, and interpretation of data for the work. She made a significant contribution to drafting of the work, revising it critically for important intellectual content and final approval of the version to be published. She agrees to be accountable for all aspects of the work in ensuring that questions related to the accuracy or integrity of any part of the work are appropriately investigated and resolved.
2. Todd A. Girard made substantial contributions to design of the work, as well as to the analysis and interpretation of data for the work. He made a significant contribution to revising the manuscript for important intellectual content and final approval of the version to be published. He agrees to be accountable for all aspects of the work in ensuring that questions related to the accuracy or integrity of any part of the work are appropriately investigated and resolved.
3. Michael D. Cusimano made substantial contributions to design of the work as well as to the interpretation of data for the work. He made a significant contribution to revising the manuscript for important intellectual content and final approval of the version to be published. He agrees to be accountable for all aspects of the work in ensuring that questions related to the accuracy or integrity of any part of the work are appropriately investigated and resolved.
4. Colin M. Shapiro made substantial contributions to design of the work, as well as to the acquisition and interpretation of data for the work. He made a significant contribution to revising the manuscript for important intellectual content and final approval of the version to be published. He agrees to be accountable for all aspects of the work in ensuring that



1  
2  
3 questions related to the accuracy or integrity of any part of the work are appropriately  
4  
5 investigated and resolved.  
6  
7  
8  
9  
10  
11  
12  
13  
14  
15  
16  
17  
18  
19  
20  
21  
22  
23  
24  
25  
26  
27  
28  
29  
30  
31  
32  
33  
34  
35  
36  
37  
38  
39  
40  
41  
42  
43  
44  
45  
46  
47  
48  
49  
50  
51  
52  
53  
54  
55  
56  
57  
58  
59  
60

Confidential

1  
2  
3  
4  
5  
6  
7  
8  
9  
10  
11  
12  
13  
14  
15  
16  
17  
18  
19  
20  
21  
22  
23  
24  
25  
26  
27  
28  
29  
30  
31  
32  
33  
34  
35  
36  
37  
38  
39  
40  
41  
42  
43  
44  
45  
46  
47  
48  
49  
50  
51  
52  
53  
54  
55  
56  
57  
58  
59  
60

## References

1. Rao DP, McFaull S, Thompson, W, Jayaraman G.C. Trends in self-reported traumatic brain injury among Canadians, 2005–2014: a repeated cross-sectional analysis. *Canadian Medical Association Journal, Open*. 2017;5(2):301-7.
2. WHO. Neurological disorders: Public health challenges.: WHO (World Health Organization); 2006 [
3. Cassidy JD, Carroll LJ, Peloso PM, Borg J, von Holst H, Holm L, et al. Incidence, risk factors and prevention of mild traumatic brain injury: results of the WHO Collaborating Centre Task Force on Mild Traumatic Brain Injury. *J Rehabil Med*. 2004(43 Suppl):28-60.
4. Grima N, Ponsford J, Rajaratnam SM, Mansfield D, Pase MP. Sleep Disturbances in Traumatic Brain Injury: A Meta-Analysis. *Journal of clinical sleep medicine : JCSM : official publication of the American Academy of Sleep Medicine*. 2016;12(3):419-28.
5. Mathias JL, Alvaro PK. Prevalence of sleep disturbances, disorders, and problems following traumatic brain injury: a meta-analysis. *Sleep medicine*. 2012;13(7):898-905.
6. Mollayeva T, Shapiro CM, Mollayeva S, Cassidy JD, Colantonio A. Modeling community integration in workers with delayed recovery from mild traumatic brain injury. *BMC Neurol*. 2015;15:194.

- 1  
2  
3 7. Theadom A, Cropley M, Parmar P, Barker-Collo S, Starkey N, Jones K, et al. Sleep  
4 difficulties one year following mild traumatic brain injury in a population-based study. *Sleep*  
5  
6 *Med.* 2015;16(8):926-32.  
7
- 8  
9  
10 8. Theadom A, Starkey N, Jones K, Cropley M, Parmar P, Barker-Collo S, et al. Sleep  
11 difficulties and their impact on recovery following mild traumatic brain injury in children. *Brain*  
12  
13 *Inj.* 2016;30(10):1243-8.  
14
- 15  
16  
17 9. Yaeger K, Alhilali L, Fakhran S. Evaluation of tentorial length and angle in sleep-wake  
18 disturbances after mild traumatic brain injury. *AJR American journal of roentgenology.*  
19  
20 2014;202(3):614-8.  
21
- 22  
23  
24 10. Ayalon L, Borodkin K, Dishon L, Kanety H, Dagan Y. Circadian rhythm sleep disorders  
25 following mild traumatic brain injury. *Neurology.* 2007;68(14):1136-40.  
26
- 27  
28  
29 11. AASM. International Classification of Sleep Disorders: Diagnostic and Coding Manual.  
30 3rd edition ed. Darien American Academy of Sleep Medicine 2014.  
31
- 32  
33  
34 12. Edinger JD, Kirby A, Lineberger M, Loiselle M, Wohlgemuth W, Means MK. The Duke  
35 Structured Interview for Sleep Disorders. In: Center DUM, editor. 2004.  
36
- 37  
38  
39 13. Buysse DJ, Ancoli-Israel S, Edinger JD, Lichstein KL, Morin CM. Recommendations for  
40 a standard research assessment of insomnia. *Sleep.* 2006;29(9):1155-73.  
41
- 42  
43  
44 14. Morin CM. *Insomnia: Psychological assessment and management.* New York, NY:  
45 Guilford Press; 1993.  
46
- 47  
48  
49 15. Morin CM, Belleville G, Belanger L, Ivers H. The Insomnia Severity Index:  
50 psychometric indicators to detect insomnia cases and evaluate treatment response. *Sleep.*  
51 2011;34(5):601-8.  
52  
53  
54  
55  
56  
57  
58  
59  
60

1  
2  
3 16. Philips Respironics. Actiwatch 2  
4

5 <http://www.actigraphy.com/solutions/actiwatch/actiwatch2.html>  
6

7  
8 17. Carney CE, Buysse DJ, Ancoli-Israel S, Edinger JD, Krystal AD, Lichstein KL, et al. The  
9  
10 consensus sleep diary: standardizing prospective sleep self-monitoring. *Sleep*. 2012;35(2):287-  
11  
12 302.  
13

14 18. Maich KH, Lachowski AM, Carney CE. Psychometric Properties of the Consensus Sleep  
15  
16  
17  
18  
19  
20  
21  
22  
23  
24  
25  
26  
27  
28  
29  
30  
31  
32  
33  
34  
35  
36  
37  
38  
39  
40  
41  
42  
43  
44  
45  
46  
47  
48  
49  
50  
51  
52  
53  
54  
55  
56  
57  
58  
59  
60  
Diary in Those With Insomnia Disorder. *Behav Sleep Med*. 2016:1-18.

19 19. Benloucif S, Burgess HJ, Klerman EB, Lewy AJ, Middleton B, Murphy PJ, et al.  
20  
21  
22  
23  
24  
25  
26  
27  
28  
29  
30  
31  
32  
33  
34  
35  
36  
37  
38  
39  
40  
41  
42  
43  
44  
45  
46  
47  
48  
49  
50  
51  
52  
53  
54  
55  
56  
57  
58  
59  
60  
Measuring melatonin in humans. *Journal of clinical sleep medicine : JCSM : official publication  
of the American Academy of Sleep Medicine*. 2008;4(1):66-9.

26 20. Naing, L, Winn, T., Ruslin, B.N. Practical issues in calculating the sample size for  
27  
28  
29  
30  
31  
32  
33  
34  
35  
36  
37  
38  
39  
40  
41  
42  
43  
44  
45  
46  
47  
48  
49  
50  
51  
52  
53  
54  
55  
56  
57  
58  
59  
60  
prevalence studies. . *Archives of Orofacial Sciences*. 2006;1:9-15.

31 21. Weitzman ED, Czeisler CA, Coleman RM, Spielman AJ, Zimmerman JC, Dement W, et  
32  
33  
34  
35  
36  
37  
38  
39  
40  
41  
42  
43  
44  
45  
46  
47  
48  
49  
50  
51  
52  
53  
54  
55  
56  
57  
58  
59  
60  
al. Delayed sleep phase syndrome. A chronobiological disorder with sleep-onset insomnia. *Arch  
Gen Psychiatry*. 1981;38(7):737-46.

38 22. Schrader H, Bovim G, Sand T. The prevalence of delayed and advanced sleep phase  
39  
40  
41  
42  
43  
44  
45  
46  
47  
48  
49  
50  
51  
52  
53  
54  
55  
56  
57  
58  
59  
60  
syndromes. *J Sleep Res*. 1993;2(1):51-5.

42 23. Paine SJ, Fink J, Gander PH, Warman GR. Identifying advanced and delayed sleep phase  
43  
44  
45  
46  
47  
48  
49  
50  
51  
52  
53  
54  
55  
56  
57  
58  
59  
60  
disorders in the general population: a national survey of New Zealand adults. *Chronobiol Int*.  
2014;31(5):627-36.

49 24. Lovato N, Gradisar M, Short M, Dohnt H, Micic G. Delayed sleep phase disorder in an  
50  
51  
52  
53  
54  
55  
56  
57  
58  
59  
60  
Australian school-based sample of adolescents. *J Clin Sleep Med*. 2013;9(9):939-44.

- 1  
2  
3 25. Saxvig IW, Pallesen S, Wilhelmsen-Langeland A, Molde H, Bjorvatn B. Prevalence and  
4 correlates of delayed sleep phase in high school students. *Sleep Med.* 2012;13(2):193-9.  
5  
6
- 7 26. Sivertsen B, Pallesen S, Stormark KM, Boe T, Lundervold AJ, Hysing M. Delayed sleep  
8 phase syndrome in adolescents: prevalence and correlates in a large population based study.  
9  
10 *BMC Public Health.* 2013;13:1163.  
11  
12
- 13 27. Yaeger K, Alhilali L, Fakhran S. Evaluation of tentorial length and angle in sleep-wake  
14 disturbances after mild traumatic brain injury. *AJR Am J Roentgenol.* 2014;202(3):614-8.  
15  
16
- 17 28. Micic G, Lovato N, Gradisar M, Ferguson SA, Burgess HJ, Lack LC. The etiology of  
18 delayed sleep phase disorder. *Sleep Med Rev.* 2016;27:29-38.  
19  
20
- 21 29. Burgess HJ, Eastman CI. A late wake time phase delays the human dim light melatonin  
22 rhythm. *Neurosci Lett.* 2006;395(3):191-5.  
23  
24
- 25 30. Atkinson G, Reilly T. Circadian variation in sports performance. *Sports Med.*  
26 1996;21(4):292-312.  
27  
28
- 29 31. Milewski MD, Skaggs DL, Bishop GA, Pace JL, Ibrahim DA, Wren TA, et al. Chronic  
30 lack of sleep is associated with increased sports injuries in adolescent athletes. *J Pediatr Orthop.*  
31 2014;34(2):129-33.  
32  
33
- 34 32. Dewald JF, Meijer AM, Oort FJ, Kerkhof GA, Bogels SM. The influence of sleep  
35 quality, sleep duration and sleepiness on school performance in children and adolescents: A  
36 meta-analytic review. *Sleep Med Rev.* 2010;14(3):179-89.  
37  
38
- 39 33. Drake C, Roehrs T, Breslau N, Johnson E, Jefferson C, Scofield H, et al. The 10-year risk  
40 of verified motor vehicle crashes in relation to physiologic sleepiness. *Sleep.* 2010;33(6):745-52.  
41  
42
- 43 34. Melamed S, Oksenberg A. Excessive daytime sleepiness and risk of occupational injuries  
44 in non-shift daytime workers. *Sleep.* 2002;25(3):315-22.  
45  
46  
47  
48  
49  
50  
51  
52  
53  
54  
55  
56  
57  
58  
59  
60

- 1  
2  
3 35. Silva EJ, Wang W, Ronda JM, Wyatt JK, Duffy JF. Circadian and wake-dependent  
4 influences on subjective sleepiness, cognitive throughput, and reaction time performance in older  
5 and young adults. *Sleep*. 2010;33(4):481-90.  
6  
7  
8  
9  
10 36. Bioulac S, Franchi JM, Arnaud M, Sagaspe P, Moore N, Salvo F, et al. Risk of Motor  
11 Vehicle Accidents Related to Sleepiness at the Wheel: A Systematic Review and Meta-Analysis.  
12 *Sleep*. 2017;40(10).  
13  
14  
15  
16  
17 37. Rosenwasser AM. Chronobiology of ethanol: animal models. *Alcohol*. 2015;49(4):311-9.  
18  
19 38. Paparrigopoulos T, Melissaki A, Tsekou H, Efthymiou A, Kribeni G, Baziotis N, et al.  
20 Melatonin secretion after head injury: a pilot study. *Brain injury*. 2006;20(8):873-8.  
21  
22  
23  
24 39. Seifman MA, Adamides AA, Nguyen PN, Vallance SA, Cooper DJ, Kossmann T, et al.  
25 Endogenous melatonin increases in cerebrospinal fluid of patients after severe traumatic brain  
26 injury and correlates with oxidative stress and metabolic disarray. *Journal of Cerebral Blood  
27 Flow and Metabolism*. 2008;28(4):684-96.  
28  
29  
30  
31  
32  
33 40. Guaraldi P, Sancisi E, La Morgia C, Calandra-Buonaura G, Carelli V, Cameli O, et al.  
34 Nocturnal melatonin regulation in post-traumatic vegetative state: a possible role for melatonin  
35 supplementation? *Chronobiology international*. 2014;31(5):741-5.  
36  
37  
38  
39  
40 41. Steele DL, Rajaratnam SM, Redman JR, Ponsford JL. The effect of traumatic brain injury  
41 on the timing of sleep. *Chronobiology international*. 2005;22(1):89-105.  
42  
43  
44  
45 42. Shekleton JA, Parcell DL, Redman JR, Phipps-Nelson J, Ponsford JL, Rajaratnam SM.  
46 Sleep disturbance and melatonin levels following traumatic brain injury. *Neurology*.  
47 2010;74(21):1732-8.  
48  
49  
50  
51  
52  
53  
54  
55  
56  
57  
58  
59  
60

Table 1. *Key Features of the Circadian Rhythm Sleep-Wake Disorders Diagnosed in this Study*

| <b>Circadian Disorder</b>         | <b>Characteristic sleep pattern</b>                                                                                 | <b>Main clinical features</b>                                                                                                                                                                                                                                                                                                   | <b>Epidemiology</b>                                                                                                                                                                                                  | <b>Treatment</b>                                                                                                                                                                                                       |
|-----------------------------------|---------------------------------------------------------------------------------------------------------------------|---------------------------------------------------------------------------------------------------------------------------------------------------------------------------------------------------------------------------------------------------------------------------------------------------------------------------------|----------------------------------------------------------------------------------------------------------------------------------------------------------------------------------------------------------------------|------------------------------------------------------------------------------------------------------------------------------------------------------------------------------------------------------------------------|
| Delayed sleep-wake phase disorder | Delayed main sleep episode (usually by at least two hours) relative to the socially desired or required sleep time. | <ul style="list-style-type: none"> <li>• Sleep initiation insomnia and difficulty with waking when sleep schedule is socially imposed, but significantly improved sleep when sleep schedule is freely chosen.</li> <li>• Excessive sleepiness in the morning.</li> <li>• Risk for the development of mood disorders.</li> </ul> | <ul style="list-style-type: none"> <li>• Usually starts in adolescence.</li> <li>• Prevalence in general population: 0.17% - 1.53%</li> <li>• 5-10% of individuals with chronic insomnia in sleep clinics</li> </ul> | <ul style="list-style-type: none"> <li>• Strategically timed oral melatonin based on DLMO<sup>c,ad,a</sup></li> <li>• Post-awakening light therapy in conjunction with behavioral treatment <sup>c,ad</sup></li> </ul> |

1  
2  
3  
4  
5  
6  
7  
8  
9  
10  
11  
12  
13  
14  
15  
16  
17  
18  
19  
20  
21  
22  
23  
24  
25  
26  
27  
28  
29  
30  
31  
32  
33  
34  
35  
36  
37  
38  
39  
40  
41  
42  
43  
44  
45  
46  
47

|                                      |                                                                                                             |                                                                                                                                                                                                                                                   |                                                                                                                                                                                                                                                                                       |                                                                                                                                           |
|--------------------------------------|-------------------------------------------------------------------------------------------------------------|---------------------------------------------------------------------------------------------------------------------------------------------------------------------------------------------------------------------------------------------------|---------------------------------------------------------------------------------------------------------------------------------------------------------------------------------------------------------------------------------------------------------------------------------------|-------------------------------------------------------------------------------------------------------------------------------------------|
| Advanced sleep-wake phase disorder   | Advanced main sleep episode (at least by two hours) relative to the socially desired or required sleep time | <ul style="list-style-type: none"> <li>• Inability to stay awake until the socially desirable time in the evening and inability to remain asleep until a socially desirable wake time.</li> <li>• Excessive sleepiness in the evening.</li> </ul> | <ul style="list-style-type: none"> <li>• Approximately 1% of the general population has advanced sleep phase</li> <li>• Prevalence of advanced sleep-wake phase disorder in the general population and in sleep clinic insomnia samples is unknown but thought to be rare.</li> </ul> | <ul style="list-style-type: none"> <li>• Evening light therapy</li> </ul>                                                                 |
| Irregular sleep-wake rhythm disorder | Irregular sleep episodes typically shorter than 4 hours; total 24 h sleep duration can be normal.           | <ul style="list-style-type: none"> <li>• Insomnia at night and excessive sleepiness during the day.</li> </ul>                                                                                                                                    | <ul style="list-style-type: none"> <li>• Described in neuro-developmental and neuro-degenerative disorders and after TBI.</li> </ul>                                                                                                                                                  | <ul style="list-style-type: none"> <li>• Light therapy in elderly patients with dementia</li> <li>• Melatonin <sup>c, ad</sup></li> </ul> |

Note: TBI: traumatic brain injury; DLMO: dim light melatonin onset; c: children; ad: adolescents; a: adults



Table 2. *Participant Characteristics*

|                                        | No (%)  | Median (IQR)                    | Min-max |
|----------------------------------------|---------|---------------------------------|---------|
| <b>Age (years)</b>                     |         | 39.5 (23.8)                     | 17- 62  |
|                                        |         | 25 <sup>th</sup> percentile: 28 |         |
|                                        |         | 75 <sup>th</sup> percentile: 51 |         |
| <b>Gender</b>                          |         |                                 |         |
| Male                                   | 18 (36) |                                 |         |
| Female                                 | 32 (64) |                                 |         |
| <b>Education</b>                       |         |                                 |         |
| High school                            | 13 (26) |                                 |         |
| College                                | 12 (24) |                                 |         |
| University                             | 25 (50) |                                 |         |
| <b>Employment status</b>               |         |                                 |         |
| Full time                              | 21 (42) |                                 |         |
| Part time                              | 5 (10)  |                                 |         |
| Student                                | 4 (8)   |                                 |         |
| Unemployed                             | 8 (16)  |                                 |         |
| Sick leave/disability                  | 11(22)  |                                 |         |
| Retired                                | 1 (2)   |                                 |         |
| <b>Number of concussions</b>           |         |                                 |         |
| Single                                 | 32 (64) |                                 |         |
| Multiple                               | 18 (36) |                                 |         |
| <b>Time since the injury*</b> (months) |         | 11.5 (12)                       | 3 - 27  |
|                                        |         | 25 <sup>th</sup> percentile: 8  |         |
|                                        |         | 75 <sup>th</sup> percentile: 20 |         |

Table 2. *Participant Characteristics (continued from previous page)*

|                                                                                     | No (%)  | Median (IQR) | Min-<br>max |
|-------------------------------------------------------------------------------------|---------|--------------|-------------|
| <b>Cause of injury</b>                                                              |         |              |             |
| Car accident                                                                        | 18 (36) |              |             |
| Sport injury                                                                        | 18 (36) |              |             |
| Fall                                                                                | 9 (18)  |              |             |
| Object hit the head                                                                 | 2 (4)   |              |             |
| Physical assault                                                                    | 2 (4)   |              |             |
| Workplace injury                                                                    | 1 (2)   |              |             |
| <b>Referral source</b>                                                              |         |              |             |
| Head injury clinic                                                                  | 18 (36) |              |             |
| Family medicine clinic                                                              | 16 (32) |              |             |
| Concussion/sport clinic                                                             | 6 (12)  |              |             |
| Sleep clinic                                                                        | 4 (8)   |              |             |
| Speech-language pathologist, neurologist,<br>physiotherapist, emergency specialists | 2 (4)   |              |             |

*Note:* \* Time elapsed since the injury. If a participant had multiple concussions, it is time elapsed since the injury that preceded the onset of the sleep problem. IQR = interquartile range

Table 3. *Circadian Rhythm Sleep-Wake Disorder Diagnoses*

|                                     | <b>ASWPD</b> | <b>DSWPD</b> | <b>ISWRD</b> | <b>No CRSWD</b> |
|-------------------------------------|--------------|--------------|--------------|-----------------|
| In the full sample (n = 50)         | 4 ± 5%       | 20 ± 11%     | 2 ± 4%       | 74 ± 12%        |
| In participants ≤ 31 years (n = 16) | 0%           | 50 ± 25%     | 0%           | 50 ± 25%        |
| In participants > 31 years (n = 34) | 6 ± 8%       | 3 ± 6%       | 3 ± 6%       | 88 ± 11%        |

*Note:* Data represent the prevalence in percentages ± 95% CI. ASWPD = advanced sleep-wake phase disorder, DSWPD = delayed sleep-wake phase disorder, ISWRD = irregular sleep-wake rhythm disorder, CRSWD = circadian rhythm sleep-wake disorder

1  
2  
3  
4  
5  
6  
7  
8  
9  
10  
11  
12  
13  
14  
15  
16  
17  
18  
19  
20  
21  
22  
23  
24  
25  
26  
27  
28  
29  
30  
31  
32  
33  
34  
35  
36  
37  
38  
39  
40  
41  
42  
43  
44  
45  
46  
47

Table 4. Age, Gender and Employment Status of Participants without a Circadian Rhythm Sleep-Wake Disorder and Participants with Delayed Phase Sleep Wake Disorder

|                          | Without CRSWD (N = 37) |                                                                                 |         | DPSWD (N = 10) |                                                                                |         |
|--------------------------|------------------------|---------------------------------------------------------------------------------|---------|----------------|--------------------------------------------------------------------------------|---------|
|                          | No (%)                 | Median (IQR)                                                                    | Min-max | No (%)         | Median (IQR)                                                                   | Min-max |
| <b>Age (years)</b>       |                        | 40 (23.5)<br>25 <sup>th</sup> percentile: 31<br>75 <sup>th</sup> percentile: 54 | 17 - 62 |                | 26 (11)<br>25 <sup>th</sup> percentile: 20.5<br>75 <sup>th</sup> percentile:30 | 17 - 54 |
| <b>Gender</b>            |                        |                                                                                 |         |                |                                                                                |         |
| Male                     | 18 (36)                |                                                                                 |         | 5 (50)         |                                                                                |         |
| Female                   | 32 (64)                |                                                                                 |         | 5 (50)         |                                                                                |         |
| <b>Employment status</b> |                        |                                                                                 |         |                |                                                                                |         |
| Full time                | 17 (46)                |                                                                                 |         | 3 (30)         |                                                                                |         |
| Part time                | 2 (5)                  |                                                                                 |         | 2 (20)         |                                                                                |         |
| Student                  | 3 (8)                  |                                                                                 |         | 1 (10)         |                                                                                |         |
| Unemployed               | 5 (14)                 |                                                                                 |         | 3 (30)         |                                                                                |         |
| Sick leave/disability    | 9 (24)                 |                                                                                 |         | 1 (10)         |                                                                                |         |
| Retired                  | 1 (3)                  |                                                                                 |         | 0 (0)          |                                                                                |         |

Confidential

Table 5. *DLMO and Sleep Timing*

|                         | No CRSWD (n = 37) |                           | DSWPD<br>(n = 10) |                           | Effect sizes (r) |
|-------------------------|-------------------|---------------------------|-------------------|---------------------------|------------------|
|                         | Mean (SD)         | 95% BCa CI of<br>the Mean | Mean (SD)         | 95% BCa CI of the<br>Mean |                  |
| DLMO                    | 20:24 (1.8)*      | 20:06 – 20:40             | 22:73 (0.63)*     | 22:18 – 23:18             | .73              |
| Bedtime                 | 23:34 (0.8)*      | 23:17 - 23:50             | 24:55 (1.0) *     | 24:19 – 25:40             | .58              |
| Sleep onset time        | 24: 17 (0.9)*     | 24:01 – 24: 39            | 02:00 (1.0)*      | 01:26 – 02:36             | .63              |
| Sleep midpoint          | 03:50 (.53)*      | 03:41 - 04:03             | 05:20 (1.3)*      | 04:32 – 06:06             | .81              |
| Wake time               | 7:21 (0.5)*       | 7:14 – 7:34               | 8:41 (1.9)*       | 7:30 – 9:45               | .73              |
| Getting out of bed time | 8:02 (0.6)*       | 7:53 – 8.18               | 9:41 (1.8)*       | 8:29 – 10:47              | .80              |

*Note:* 95 BCa CI = 95% bias corrected accelerated confidence interval based on 1000 bootstrapping samples. \* denotes statistically significant differences between the groups.

Time is in the International Organization for Standardization (ISO) 8601 format

1  
2  
3  
4  
5  
6  
7  
8  
9  
10  
11  
12  
13  
14  
15  
16  
17  
18  
19  
20  
21  
22  
23  
24  
25  
26  
27  
28  
29  
30  
31  
32  
33  
34  
35  
36  
37  
38  
39  
40  
41  
42  
43  
44  
45  
46  
47  
48  
49  
50  
51  
52  
53  
54  
55  
56  
57  
58  
59  
60

Figure 1. *Participant Flow*

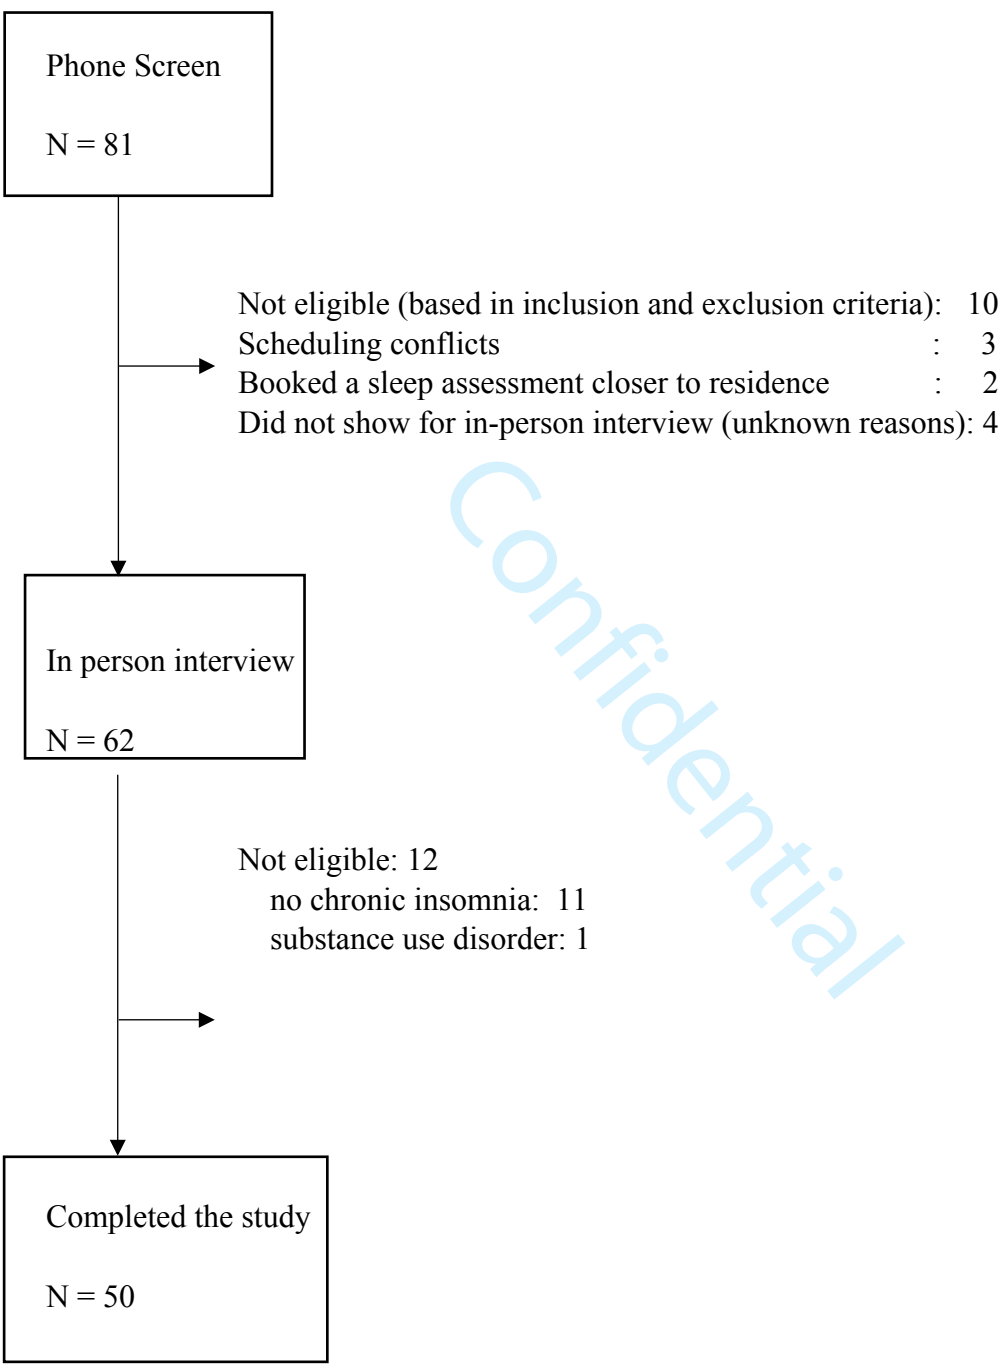

Confidential

# Circadian Rhythm – A Neglected Aspect of the Post-Concussion Insomnia Assessment

A Cross-sectional, Observational Study

## Authors:

1. Dora M. Zalai, MD, PhD, Ryerson University
2. Todd A. Girard, PhD, Ryerson University
3. Michael D. Cusimano, MD, PhD, St. Michael's Hospital, University of Toronto
4. Colin M. Shapiro, MBBCh, PhD, University of Toronto & Youthdale Child and Adolescent Sleep Centre

Corresponding author's e-mail: [dora.zalai@psych.ryerson.ca](mailto:dora.zalai@psych.ryerson.ca)

**Funding:** Dora Zalai's research was supported by the Canadian Institutes of Health Research Frederick Banting and Charles Best Canada Graduate Scholarship Award and the Youthdale Foundation. Dr. Cusimano's work was supported by the Canadian Institutes of Health Research Strategic Team Grant in Applied Injury Research # TIR-103946 and the Ontario Neurotrauma Foundation.

**Competing Interests:** The authors have no potential conflict of interest to disclose.

## Abstract

**Background:** Insomnia is a major predictor of adverse outcomes in mild traumatic brain injury (mTBI), including concussion. Insomnia symptoms may be maintained by circadian rhythm sleep-wake disorders. While previous studies have focused on insomnia symptom assessment, we provide a diagnostic circadian workup in a homogeneous sample of patients with chronic insomnia symptoms following a mTBI. Detection and treatment of CRSWD may open a new avenue to facilitate recovery from mTBI. Objective: To determine the prevalence of CRSWD in individuals with chronic insomnia following a mTBI.

**Methods:** Individuals with mTBI (Glasgow Coma Scale 13-15) and chronic insomnia (Insomnia Severity Index > 11 and [assessed in a clinical interview](#)) were recruited from diverse community clinics 3 - 24 months post-injury to participate in this cross-sectional observational study. Potential participants (n = 81) were screened by phone and participated in an intake clinical interview (n = 62) before enrollment (n = 50). Exclusion criteria: (a) alcohol/ substance use problems; (b) pre-existing brain disorders/previous neurosurgery; (c) travelled across more than two time zones less than three weeks prior to the screening; (d) shift work schedule. Assessments (clinical interview, standard questionnaire; 2 weeks of actigraphy and sleep diary and dim light melatonin onset test) were conducted in a sleep and circadian clinic. Outcome measure: Percentage of patients with CRSWD.

**Results:** Among the 50 participants, (median age: 39.5 – IQR 23.8; 64% females) 26% had a CRSWD. The most common (77%) circadian diagnosis was delayed sleep-wake phase disorder, [with 56% prevalence in the 17-31 age group.](#)

**Interpretation:** The prevalence of CRSWD is exceptionally high among individuals with chronic insomnia symptoms following a mTBI. Accurate diagnosis and treatment of these



1  
2  
3 disorders may improve the post-concussion recovery of approximately a quarter of all patients  
4  
5 and half of adolescents and young adults who suffer from chronic insomnia following a mTBI.  
6  
7  
8  
9  
10  
11  
12  
13  
14  
15  
16  
17  
18  
19  
20  
21  
22  
23  
24  
25  
26  
27  
28  
29  
30  
31  
32  
33  
34  
35  
36  
37  
38  
39  
40  
41  
42  
43  
44  
45  
46  
47  
48  
49  
50  
51  
52  
53  
54  
55  
56  
57  
58  
59  
60

Confidential

1  
2  
3 Traumatic brain injury (TBI) – a brain trauma caused by an external mechanical force - is  
4 the leading cause of disability among young adults and has rising incidence rate in Canada,  
5 especially in the 18-34 age group (1, 2). Mild TBI (mTBI) - including concussion - constitute  
6 the majority (70-90%) of all treated TBI cases and has the largest contribution to the burden of  
7 injury-related disability (3). Early detection and effective management of medical conditions that  
8 hinder recovery could prevent disability and substantially reduce societal costs.  
9  
10  
11  
12  
13  
14  
15

16  
17 Difficulties with falling asleep, staying asleep or early morning final awakening  
18 (insomnia) are the most common persistent sleep symptoms after mTBI, including concussion (4,  
19 5). Insomnia after concussion worsens fatigue, pain, cognition and mood and predicts poor  
20 overall prognosis for recovery (6-8). Since the disorders of sleep and wakefulness that cause  
21 chronic insomnia symptoms can be effectively treated, it becomes important to characterize and  
22 diagnose the sleep disorders that maintain insomnia symptoms after mTBI. Effective treatment  
23 of these disorders holds the promise of improving the management of persistent post-concussive  
24 symptoms and hastening recovery from mTBI.  
25  
26  
27  
28  
29  
30  
31  
32  
33  
34

35 Chronic insomnia is a shared symptom of circadian rhythm sleep-wake disorders  
36 (~~CRSWD~~); see Table 1. These disorders arise if there is a disruption of the endogenous circadian  
37 system or a misalignment between the internal circadian rhythm and the external environment.  
38  
39  
40 The best biological marker of ~~CRSWD~~circadian rhythm sleep-wake disorders is abnormal dim  
41 light melatonin onset (DLMO), while the behavioural diagnostic feature is that sleep phase is  
42 significantly delayed, advanced or irregular relative to environmental time and social norms.  
43  
44  
45  
46  
47  
48

49 A neuroimaging study suggests that mTBI may cause pineal gland injury and disrupt  
50 circadian regulation via its effect on melatonin secretion (9). Only one clinical study has  
51 performed diagnostic circadian assessment in a group of patients with mTBI hitherto (10). This  
52  
53  
54  
55  
56  
57  
58  
59  
60

1  
2  
3 study selected 15 individuals from 42 sleep clinic patients with mTBI and insomnia; however,  
4  
5 selection criteria were not provided; DLMOs were not reported; time since injury was not  
6  
7 specified, and the age range was restricted to young and early-middle age adults. Each of the 15  
8  
9 patients was diagnosed with a ~~CRSWD~~circadian rhythm sleep-wake disorder -- 7 with delayed  
10  
11 sleep-wake phase disorder (~~DSWPD~~) and 6 with irregular sleep-wake rhythm disorder (~~ISWRD~~).  
12  
13 These results suggest that the prevalence of ~~CRSWD~~circadian rhythm sleep-wake disorders may  
14  
15 be higher among mTBI patients with chronic insomnia symptoms than the known prevalence in  
16  
17 relevant comparisons groups (i.e. sleep clinic insomnia samples) but the above shortcomings  
18  
19 limit the interpretability of the above results.  
20  
21  
22  
23

24  
25 Given that ~~CRSWD~~circadian rhythm sleep-wake disorders require specific circadian  
26  
27 assessment and treatment, it is pertinent to establish if patients with mTBI and insomnia  
28  
29 symptoms comprise one of the few clinical groups where ~~CRSWD~~circadian rhythm sleep-wake  
30  
31 disorders are prevalent. If this is the case, circadian assessment and treatment becomes an  
32  
33 important part of chronic insomnia work-up and management following mTBI.  
34

### 35 **Objective and Hypothesis**

36  
37  
38 The objective was to determine the rate of ~~CRSWD~~circadian rhythm sleep-wake  
39  
40 disorders according to standard diagnostic criteria using evidence-based comprehensive  
41  
42 assessment – including actigraphy and DLMO - in a large consecutive and representative sample  
43  
44 of individuals with chronic insomnia following mTBI. The hypothesis was that ~~CRSWD~~  
45  
46 circadian rhythm sleep-wake disorders would be more common in this clinical group than it is in  
47  
48 individuals who seek treatment for chronic insomnia in sleep clinics (5-10%) (11).  
49  
50  
51  
52  
53  
54  
55  
56  
57  
58  
59  
60

## Method

**Participants.** Participant characteristics are summarized in Table 2. Inclusion criteria: (a) mTBI (Glasgow Coma Score  $\geq 13$  at the time of injury) three to 24 months prior to the screening assessment; (b) chronic insomnia symptoms that started or significantly amplified following the injury; (c) age between 17 and 65 years. [When participants had multiple concussions, the mTBI after which the sleep problem started was in the time frame of three to 24 months.](#) Exclusion criteria: (a) had alcohol or other substance use problems within three months prior to enrollment based on DSM 5 criteria; (b) needed immediate psychiatric help based on in-person assessment; (c) had pre-existing brain disorders or neurosurgery; (d) had travelled across more than two time zones less than three weeks prior to the phone screening; or (e) had a shift work schedule.

**Procedures.** [Information of the study was distributed widely to hospitals and community clinics in South Ontario, in the Georgian Bay and Sudbury areas and it was published on brain injury organization and sleep clinic websites \(Referral sources are summarized in Table 2\).](#) [We received 81 referrals within the 12-month recruitment phase. Following phone screens, a semi-structured interview and completion of the Insomnia Severity Index, however, 22 were ineligible. Another 5 had scheduling or assessment conflicts, and four failed to show in person. Nobody needed to be excluded for reasons of shift work, travel across time zones or psychiatric conditions \(Figure 1\). Thus, final enrollment comprised 50 patients with mTBI and chronic insomnia symptoms. In the subsequent 12-14 days after their enrollment, participants kept a sleep diary and wore an actiwatch on their non-dominant wrist. Finally, they participated in a DLMO test in 12-14 days following their initial interview.](#)

### Assessment tools and methods.

Insomnia Assessment:

1  
2  
3 The *Duke Structured Interview for Sleep Disorders* (DSISD) assesses sleep disorders  
4 according to clinical and research diagnostic criteria (12). The study used an updated version of  
5 the DSISD in which the insomnia section has been modified to match the new DSM 5 criteria.  
6  
7 The DSISD was used to select individuals with chronic insomnia.  
8  
9

10  
11  
12 The *Insomnia Severity Index* (ISI; Morin, 1993) measures the subjective severity of  
13 insomnia symptoms (13, 14). The degree of insomnia severity is determined by the summary  
14 scores of seven items as follows: 0 to 7 -no clinical insomnia; 8 to 14- “sub-threshold” insomnia;  
15 15 to 21 -moderate insomnia; and 22 to 28 is severe insomnia. A summary score of 11 has been  
16 recommended as a cut-off for screening for clinical insomnia research and was used as cut-off  
17 for inclusion in this study (15).  
18  
19  
20  
21  
22  
23  
24  
25

26 Assessment of sleep pattern:

27  
28 *Wrist Actigraphy* is a recommended diagnostic assessment tool for [CRSWD](#)[circadian rhythm](#)  
29 [sleep-wake disorders](#) (11). Participants wore a Philips Respironics Actiwatch 2 on their non-  
30 dominant wrist (16). [The device detects movement using a solid piezoelectric accelerometer with](#)  
31 [0.35-7.5Hz bandwidth and 0.5-2G peak value.](#) The device was set to record 30-second epochs at  
32 medium sensitivity to detect wake threshold. Data were scored both automatically and manually.  
33  
34 [Manual scoring involved setting the “rest period” \(the period between bedtime and rise time\).](#)  
35 [Rest time was set based on event markers \(participants marked their bedtime and rise time using](#)  
36 [the event marker function of the actiwatch\) as well as movement, light and sleep diary data.](#)  
37  
38 [After the rest periods were set, the Actiware 6.0.7. software calculated all the sleep parameters,](#)  
39 [including sleep onset latency, wake after sleep onset, total sleep time and sleep efficiency.](#)  
40  
41  
42  
43  
44  
45  
46  
47  
48  
49  
50  
51  
52  
53  
54  
55  
56  
57  
58  
59  
60

1  
2  
3 The *Consensus Sleep Diary* was developed to provide a standard sleep log based on  
4 patients' input and expert consensus (17). The sleep indices in the Consensus Sleep Diary  
5 differentiate between individuals with insomnia and good sleepers and are significantly  
6 correlated with the ISI and with actigraphy measures (18). The diary was used in the study for  
7 longitudinal subjective assessment of sleep pattern.  
8  
9

10  
11  
12  
13  
14  
15 Assessment of circadian phase:

16  
17 *Dim Light Melatonin Onset Test (DLMO) Test*. Eight saliva samples were collected from  
18 each participant according to standard procedures (Buhlmann EK DSM © Saliva Melatonin  
19 ELISA kit; Buhlmann Laboratories, Switzerland). [Light level was maximum 10 lux in the room.](#)

20  
21  
22 The three baseline samples were taken every 30 minutes and the remaining samples were  
23 collected hourly. Data collection started six hours before habitual bedtime, [which was](#)  
24 [determined based on participants' self-report and was verified from their sleep-diary data.](#)

25  
26 Medications that influence melatonin levels were prohibited/discontinued before the test.

27  
28  
29  
30  
31  
32  
33 [All assessors \(except for the first author\) were blind to the study hypothesis.](#)

34  
35 **Missing data.** Two participants had missing actigraphy data but both provided sleep diary data  
36 that could be used to determine if they had a normal sleep phase. Altogether, 47 of the 50  
37 participants completed the DLMO test. DLMO could not be precisely determined from five  
38 samples (in three DLMO was outside of the measurement period and there were technical  
39 problems with two samples).  
40  
41  
42  
43  
44  
45

## 46 47 **Analyses**

48  
49 Saliva samples were frozen and analyzed using enzyme-linked immunosorbent assay as  
50 per manufacturer's instructions (Buhlmann EK DSM © Saliva Melatonin ELISA kit; Buhlmann  
51 Laboratories, Switzerland). The intra-assay and inter-assay coefficients of variation were 7.62  
52  
53  
54  
55  
56  
57  
58  
59  
60

and 8.88. As per consensus guidelines, DLMO was determined as the clock time, when the melatonin concentration reached and remained above the threshold (two *SD* above the baseline or, when there were fewer than 3 baseline values, an absolute value of 3 pg/ml), (19).

Descriptive statistics summarized the sample characteristics, questionnaire scores, the frequency of ~~CRSWD~~ circadian rhythm sleep-wake disorders diagnoses and the relationship between ~~CRSWD~~ circadian rhythm sleep-wake disorders diagnoses and demographic data. Independent samples t tests, using bootstrapping with 1000 re-samples compared the sleep diary and DLMO data of patients with delayed sleep-wake phase disorder ~~DSWPD~~ and those without ~~CRSWD~~ circadian rhythm sleep-wake disorders (there were not enough individuals in the other sub-groups of ~~CRSWD~~ circadian rhythm sleep-wake disorders to allow statistical comparisons). Statistical significance was set at  $p \leq .008$  to correct for multiple comparisons.

~~CRSWD~~ Circadian rhythm sleep-wake disorders were diagnosed according to International Classification of Sleep Disorders (ICSD 3) criteria (11). The 95% confidence intervals (CIs) for the prevalence rates are based the corresponding precision afforded by our final sample size (N=50), (20).

## Results

Most ( $N = 46$  or 92%) participants had moderate/severe insomnia symptoms ( $ISI \geq 15$ ), while the remaining patients reported mild insomnia symptoms. Three quarters of the sample denied having subjective sleep problems or sleep disorders prior to their injury and 100% reported moderate or significant worsening of their sleep since the injury.

One-quarter (13 patients) of the 50 participants received a ~~CRSWD~~ circadian rhythm sleep-wake disorder diagnosis (Table 3), corresponding to a prevalence of  $26\% \pm 12\%$ . The most common diagnosis (10 patients) was DSWPD delayed sleep-wake phase disorder; nine of these

1  
2  
3 individuals were younger than 32 years (Table 4). All of those with [advanced sleep-wake phase](#)  
4 [disorder ASWPD](#) and [ISWRD irregular sleep-wake rhythm disorder](#) were over 40.

5  
6  
7  
8 There were large and significant differences both in the subjective behavioural (sleep  
9 diary) and objective, biological (DLMO) timing of sleep and circadian rhythm between patients  
10 with [delayed sleep-wake phase disorder DSWPD](#) and those without a [CRSWD circadian rhythm](#)  
11 [sleep-wake disorder](#) (Table 45), confirming that the clinical diagnoses accurately separated  
12 patients with [delayed sleep-wake phase disorder DSWPD](#) from those without a circadian  
13 disorder.  
14  
15  
16  
17  
18  
19  
20

## 21 Interpretation

22  
23  
24 The objective of this study was to determine what percentage of patients whose main  
25 sleep symptom is chronic insomnia following a mTBI have a [CRSWD circadian rhythm sleep-](#)  
26 [wake disorders](#). The results supported the a-priori hypothesis: 26 % of the full sample received a  
27 [circadian rhythm sleep-wake disorder CPSWD](#) diagnosis.  
28  
29  
30  
31

32  
33 Most (77%) of these participants had [DSWPD delayed sleep-wake phase disorder](#). This  
34 proportion is one-two orders of magnitude higher than the prevalence of [DSWPD delayed sleep-](#)  
35 [wake phase disorder in](#) the general population (0.17% – 1.53%) and over three times that  
36 among patients with chronic insomnia treated at sleep clinics (6.7 %) (21-23). Notably, [delayed](#)  
37 [sleep-wake phase disorder DPSWD](#) was the most common sleep disorder diagnosis in the 18-31  
38 age group with a 10-fold prevalence compared to the prevalence of [DSWPD delayed sleep-wake](#)  
39 [phase disorder in](#) the general adolescent population (11, 24-26).  
40  
41  
42  
43  
44  
45  
46  
47  
48

49 This study did not explore the causes of [DSWPD delayed sleep-wake phase disorder](#) but  
50 several etiological factors merit consideration. One MRI study noted that patients who had sleep  
51 problems following a mTBI had a longer tentorium and a flatter tentorial angle than patients who  
52  
53  
54  
55  
56  
57  
58  
59  
60



1  
2  
3 did not have sleep problems. The authors speculated that the pineal gland (the secretion site of  
4 melatonin) would be impacted by injuries caused by an anterior – posterior force in individuals  
5  
6 with this anatomical predisposition (27).  
7  
8  
9

10 Another biological predisposing factor could be a susceptibility of the sleep and circadian  
11 system for phase delay due to a long circadian period, heightened responsiveness to the  
12 melatonin suppressing effect of light in the evening; or slow accumulation and dissipation of  
13 homeostatic sleep drive – mechanisms that have been implicated in the etiology of [DSWPD](#)  
14 [delayed sleep-wake phase disorder](#) (28). If the social demand to wake up early in the morning  
15 lessens during the post injury recovery period, the sleep phase follows the circadian signals and  
16 shifts to later hours in individuals with a predisposition for phase delay. This can lead to a  
17 vicious cycle, in which longer light exposure in the evening and lack of light exposure in the  
18 morning further delays the circadian cycle (29).  
19  
20  
21  
22  
23  
24  
25  
26  
27  
28  
29

30 It is also possible that individuals with a pre-injury delayed DLMO or evening  
31 chronotype are at an increased risk for sustaining a TBI, because they are sleepy in the morning  
32 when they attend sport training, school or work. Athletic performance fluctuates across the  
33 circadian cycle and excessive sleepiness impacts cognitive performance and increases the risk for  
34 accidents and injuries (30-36). Thus, the high prevalence of [DSWPD](#) [delayed sleep-wake phase](#)  
35 [disorder](#) in mTBI/concussion samples may, in part, reflect a higher prevalence of TBI among  
36 individuals with a late DLMO and evening chronotype.  
37  
38  
39  
40  
41  
42  
43  
44  
45  
46

47 Two participants in this study received a diagnosis of [ASWPD](#) [advanced sleep-wake](#)  
48 [phase disorder](#). The prevalence of [ASWPD](#) [advanced sleep-wake phase disorder](#) -is very low  
49 both in the general population or in clinical insomnia samples, given that only individual cases  
50 and family cohorts have been described thus far (11, 22). In the current study, none of the  
51  
52  
53  
54  
55  
56  
57  
58  
59  
60

1  
2  
3 participants with [ASWPD advanced sleep-wake phase disorder](#) had a family history of [ASWPD](#)  
4  
5 [advanced sleep-wake phase disorder](#).  
6

7  
8 Finally, one participant was diagnosed with [ISWRD irregular sleep-wake rhythm](#)  
9  
10 [disorder](#). This [circadian rhythm sleep-wake disorder](#) ~~CPSWD~~ has previously been described  
11  
12 among individuals with brain pathology (11). The person in the present study with [ISWRD](#)  
13  
14 [irregular sleep-wake rhythm disorder](#) reportedly had an alcohol use disorder until six months  
15  
16 before the injury. There is an interaction between the circadian system and alcohol use disorders  
17  
18 and it is possible that pre-injury alcohol use disorder increases the risk for developing an  
19  
20 [irregular sleep-wake rhythm disorder](#) ~~ISWRD~~ following a brain injury (37).  
21  
22

23  
24 **Clinical implications.** Awareness of [CRSWD circadian rhythm sleep-wake disorders](#) is  
25  
26 generally low among clinicians but distinguishing it from insomnia disorder is crucial since the  
27  
28 treatment of insomnia disorder (cognitive behavioural therapy or selected hypnotic medications)  
29  
30 and the management of [CRSWD circadian rhythm sleep-wake disorders](#) (melatonin and bright  
31  
32 light therapy) are fundamentally different.  
33  
34

35  
36 The results of this study suggest that clinicians should be attentive to symptoms of  
37  
38 [CRSWD circadian rhythm sleep-wake disorders](#) when they see patients with persistent insomnia  
39  
40 symptoms following a mTBI, including concussion. Referral for a circadian assessment is  
41  
42 warranted if there is a significant shift of the sleep period or if the patient sleeps only for short  
43  
44 (maximum 4 hour) periods around the clock. The threshold for referring to a circadian  
45  
46 assessment should be especially low if a teenager or young adult reports significant sleep onset  
47  
48 insomnia or a delay of sleep phase following a mTBI.  
49  
50

51  
52 This study is the first to provide a rigorous multi-method diagnostic circadian assessment  
53  
54 based on standard criteria in a representative sample of patients with mTBI and chronic  
55  
56  
57  
58  
59  
60

1  
2  
3 insomnia. Previous circadian studies have included patients with moderate and severe TBI;  
4 assessed melatonin secretion without determining DLMO; or determined average DLMO in a  
5 group of patients without providing diagnostic assessment and interpretation in samples that  
6 were substantially smaller than the current sample (4, 10, 38-42). The standard clinical intake  
7 assessment at least three months after the TBI ensured that a homogeneous sample of individuals  
8 with chronic insomnia symptoms were included.  
9

10  
11  
12 In addition to the strengths of this study, some limitations should be considered. Firstly,  
13 the sample may over-represent patients who were distressed by their insomnia symptoms. At the  
14 same time, these are the patients who (ideally) would receive some form of post-concussion  
15 sleep assessment in the community. Secondly, individuals with substance use disorders and shift  
16 workers were not recruited. It is likely that the frequency of ~~CRSWD~~ [circadian rhythm sleep-](#)  
17 [wake disorders](#) is higher in those groups. Also, participants may not have reported insomnia  
18 symptoms that pre-dated the injury. This does not bias the diagnoses but precludes inferences  
19 about the possible role of the injury.  
20  
21

22  
23  
24 [The results of this study apply to treatment seeking patients with chronic insomnia](#)  
25 [symptoms who had a mTBI between three months and 24 months before the sleep assessment.](#)  
26  
27 [The percentage of circadian rhythm sleep-wake disorders may be different among individuals](#)  
28 [who do experience insomnia symptoms following the TBI, but who do not seek help in](#)  
29 [managing post-concussion or sleep symptoms, or who had a TBI more than two years before a](#)  
30 [sleep assessment.](#)  
31  
32

33  
34  
35 [The current sample size was limited by logistical constraints and this hampered the](#)  
36 [precision of the estimated prevalence rates; this was particularly true for the subsample analyses](#)  
37  
38  
39  
40  
41  
42  
43  
44  
45  
46  
47  
48  
49  
50  
51  
52  
53  
54  
55  
56  
57  
58  
59  
60

1  
2  
3 [regarding specific circadian rhythm sleep-wake disorders and those within young and older age](#)  
4 [groups. Future studies should assess circadian rhythm sleep-wake disorders in larger mTBI](#)  
5 [samples with insomnia. Finally, this study did not include an age and sex-matched comparison](#)  
6 [group of patients with chronic insomnia who did not have a history of TBI. Future replication of](#)  
7 [this study will benefit from an inclusion of such groups to allow for more direct comparison of](#)  
8 [rates and on the sleep-wake measures. Given that research on circadian rhythm sleep-wake](#)  
9 [disorders among patients with insomnia alone is limited, these studies will add valuable](#)  
10 [information not only for those with TBI, but also to the general insomnia and circadian rhythm](#)  
11 [sleep-wake disorder literature.](#)  
12  
13  
14  
15  
16  
17  
18  
19  
20  
21  
22  
23

24 It is important to emphasise that the current study did not aim to establish a cause and  
25 effect relationship between the clinical diagnoses and the injury or control for variables that may  
26 have influenced this relationship. We took a rigorous clinical approach because there is a need to  
27 generate reliable diagnostic information which can inform clinical guidelines for insomnia  
28 assessment in this clinical group. Without clinical guidelines that are based on research evidence,  
29 patients with insomnia will not receive evidence-based insomnia assessment and treatment  
30 after a concussion. The results of this study have direct clinical implications in that they draw  
31 attention to the need to assess [CRSWD circadian rhythm sleep-wake disorders](#) -in patients who  
32 suffer from chronic insomnia following a mTBI. Circadian assessment is currently not part of a  
33 standard post-concussion insomnia workup and is not a routine component of sleep clinic  
34 assessments. Consequently approximately 25% of patients with post-concussion chronic  
35 insomnia symptoms (based on the results of the current study) would not receive an appropriate  
36 diagnosis and thereby tailored treatment for their sleep difficulty which in turn leads to lower  
37 likelihood of recovery (6-8). Future longitudinal studies should identify factors that predispose  
38  
39  
40  
41  
42  
43  
44  
45  
46  
47  
48  
49  
50  
51  
52  
53  
54  
55  
56  
57  
58  
59  
60

1  
2  
3 individuals for developing ~~CRSWD circadian rhythm sleep-wake -after~~ disorders after a  
4  
5 concussion and test the nature and direction of pathways between the circadian timing of sleep  
6  
7 and wakefulness and factors that may influence this relationship in mTBI in different age groups.  
8  
9

10 **Summary and Conclusions.** One quarter of ~~treatment-seeking~~ individuals with post-  
11  
12 concussion chronic insomnia symptoms ~~had~~ ~~were diagnosed with a~~ ~~CRSWD~~ ~~circadian rhythm~~  
13 ~~sleep-wake disorder~~. ~~The majority of these patients were adolescents and young adults with 56%~~  
14 ~~prevalence of DPSWD in this age group~~. This implies that clinicians ~~may include circadian~~  
15 ~~rhythm sleep-wake disorders in their diagnostic algorithm and consider the potential benefits of~~  
16 ~~should initiate~~ a circadian assessment when patients report insomnia symptoms and a significant  
17  
18 change in their sleep phase following a mTBI. ~~The majority of these patients were adolescents~~  
19 ~~and young adults with approximately 50% prevalence of delayed phase sleep-wake disorder in~~  
20 ~~this age group; this finding warrants larger-scale replication~~. Given that insomnia symptoms are  
21  
22 major predictors of poor post-concussion recovery, detection and effective management of  
23  
24 ~~CRSWD circadian rhythm sleep-wake disorders~~ may improve the recovery ~~of approximately a~~  
25 ~~quarter of all patients and half of particularly in~~ adolescents and young adults who suffer from  
26  
27 chronic insomnia following a mTBI.  
28  
29  
30  
31  
32  
33  
34  
35  
36  
37  
38  
39  
40  
41  
42  
43  
44  
45  
46  
47  
48  
49  
50  
51  
52  
53  
54  
55  
56  
57  
58  
59  
60

### Author Contributions

1. Dora M. Zalai made substantial contributions to conception and design of the work, as well as to the acquisition, analysis, and interpretation of data for the work. She made a significant contribution to drafting of the work, revising it critically for important intellectual content and final approval of the version to be published. She agrees to be accountable for all aspects of the work in ensuring that questions related to the accuracy or integrity of any part of the work are appropriately investigated and resolved.
2. Todd A. Girard made substantial contributions to design of the work, as well as to the analysis and interpretation of data for the work. He made a significant contribution to revising the manuscript for important intellectual content and final approval of the version to be published. He agrees to be accountable for all aspects of the work in ensuring that questions related to the accuracy or integrity of any part of the work are appropriately investigated and resolved.
3. Michael D. Cusimano made substantial contributions to design of the work as well as to the interpretation of data for the work. He made a significant contribution to revising the manuscript for important intellectual content and final approval of the version to be published. He agrees to be accountable for all aspects of the work in ensuring that questions related to the accuracy or integrity of any part of the work are appropriately investigated and resolved.
4. Colin M. Shapiro made substantial contributions to design of the work, as well as to the acquisition and interpretation of data for the work. He made a significant contribution to revising the manuscript for important intellectual content and final approval of the version to be published. He agrees to be accountable for all aspects of the work in ensuring that

1  
2  
3 questions related to the accuracy or integrity of any part of the work are appropriately  
4  
5 investigated and resolved.  
6  
7  
8  
9  
10  
11  
12  
13  
14  
15  
16  
17  
18  
19  
20  
21  
22  
23  
24  
25  
26  
27  
28  
29  
30  
31  
32  
33  
34  
35  
36  
37  
38  
39  
40  
41  
42  
43  
44  
45  
46  
47  
48  
49  
50  
51  
52  
53  
54  
55  
56  
57  
58  
59  
60

Confidential

## References

1. Rao DP, McFaull S, Thompson, W, Jayaraman G.C. Trends in self-reported traumatic brain injury among Canadians, 2005–2014: a repeated cross-sectional analysis. *Canadian Medical Association Journal, Open*. 2017;5(2):301-7.
2. WHO. Neurological disorders: Public health challenges.: WHO (World Health Organization); 2006 [
3. Cassidy JD, Carroll LJ, Peloso PM, Borg J, von Holst H, Holm L, et al. Incidence, risk factors and prevention of mild traumatic brain injury: results of the WHO Collaborating Centre Task Force on Mild Traumatic Brain Injury. *J Rehabil Med*. 2004(43 Suppl):28-60.
4. Grima N, Ponsford J, Rajaratnam SM, Mansfield D, Pase MP. Sleep Disturbances in Traumatic Brain Injury: A Meta-Analysis. *Journal of clinical sleep medicine : JCSM : official publication of the American Academy of Sleep Medicine*. 2016;12(3):419-28.
5. Mathias JL, Alvaro PK. Prevalence of sleep disturbances, disorders, and problems following traumatic brain injury: a meta-analysis. *Sleep medicine*. 2012;13(7):898-905.
6. Mollayeva T, Shapiro CM, Mollayeva S, Cassidy JD, Colantonio A. Modeling community integration in workers with delayed recovery from mild traumatic brain injury. *BMC Neurol*. 2015;15:194.
7. Theadom A, Copley M, Parmar P, Barker-Collo S, Starkey N, Jones K, et al. Sleep difficulties one year following mild traumatic brain injury in a population-based study. *Sleep Med*. 2015;16(8):926-32.



- 1  
2  
3 8. Theadom A, Starkey N, Jones K, Cropley M, Parmar P, Barker-Collo S, et al. Sleep  
4 difficulties and their impact on recovery following mild traumatic brain injury in children. *Brain*  
5  
6 *Inj.* 2016;30(10):1243-8.  
7
- 8  
9  
10 9. Yaeger K, Alhilali L, Fakhran S. Evaluation of tentorial length and angle in sleep-wake  
11 disturbances after mild traumatic brain injury. *AJR American journal of roentgenology.*  
12  
13 2014;202(3):614-8.  
14
- 15  
16  
17 10. Ayalon L, Borodkin K, Dishon L, Kanety H, Dagan Y. Circadian rhythm sleep disorders  
18 following mild traumatic brain injury. *Neurology.* 2007;68(14):1136-40.  
19
- 20  
21 11. AASM. International Classification of Sleep Disorders: Diagnostic and Coding Manual.  
22  
23 3rd edition ed. Darien American Academy of Sleep Medicine 2014.  
24
- 25  
26 12. Edinger JD, Kirby A, Lineberger M, Loiselle M, Wohlgemuth W, Means MK. The Duke  
27 Structured Interview for Sleep Disorders. In: Center DUM, editor. 2004.  
28
- 29  
30 13. Buysse DJ, Ancoli-Israel S, Edinger JD, Lichstein KL, Morin CM. Recommendations for  
31 a standard research assessment of insomnia. *Sleep.* 2006;29(9):1155-73.  
32  
33
- 34  
35 14. Morin CM. *Insomnia: Psychological assessment and management.* New York, NY:  
36 Guilford Press; 1993.  
37
- 38  
39 15. Morin CM, Belleville G, Belanger L, Ivers H. The Insomnia Severity Index:  
40 psychometric indicators to detect insomnia cases and evaluate treatment response. *Sleep.*  
41  
42 2011;34(5):601-8.  
43  
44
- 45  
46 16. [Philips Respironics-P. Actiwatch 2](http://www.actigraphy.com/solutions/actiwatch/actiwatch2.html)  
47  
48  
49 <http://www.actigraphy.com/solutions/actiwatch/actiwatch2.html> f  
50  
51  
52  
53  
54  
55  
56  
57  
58  
59  
60



- 1  
2  
3 26. Sivertsen B, Pallesen S, Stormark KM, Boe T, Lundervold AJ, Hysing M. Delayed sleep  
4 phase syndrome in adolescents: prevalence and correlates in a large population based study.  
5  
6 BMC Public Health. 2013;13:1163.  
7  
8  
9  
10 27. Yaeger K, Alhilali L, Fakhran S. Evaluation of tentorial length and angle in sleep-wake  
11 disturbances after mild traumatic brain injury. *AJR Am J Roentgenol*. 2014;202(3):614-8.  
12  
13  
14 28. Micic G, Lovato N, Gradisar M, Ferguson SA, Burgess HJ, Lack LC. The etiology of  
15 delayed sleep phase disorder. *Sleep Med Rev*. 2016;27:29-38.  
16  
17  
18  
19 29. Burgess HJ, Eastman CI. A late wake time phase delays the human dim light melatonin  
20 rhythm. *Neurosci Lett*. 2006;395(3):191-5.  
21  
22  
23  
24 30. Atkinson G, Reilly T. Circadian variation in sports performance. *Sports Med*.  
25  
26 1996;21(4):292-312.  
27  
28  
29 31. Milewski MD, Skaggs DL, Bishop GA, Pace JL, Ibrahim DA, Wren TA, et al. Chronic  
30 lack of sleep is associated with increased sports injuries in adolescent athletes. *J Pediatr Orthop*.  
31  
32 2014;34(2):129-33.  
33  
34  
35 32. Dewald JF, Meijer AM, Oort FJ, Kerkhof GA, Bogels SM. The influence of sleep  
36 quality, sleep duration and sleepiness on school performance in children and adolescents: A  
37 meta-analytic review. *Sleep Med Rev*. 2010;14(3):179-89.  
38  
39  
40  
41  
42 33. Drake C, Roehrs T, Breslau N, Johnson E, Jefferson C, Scofield H, et al. The 10-year risk  
43 of verified motor vehicle crashes in relation to physiologic sleepiness. *Sleep*. 2010;33(6):745-52.  
44  
45  
46  
47 34. Melamed S, Oksenberg A. Excessive daytime sleepiness and risk of occupational injuries  
48 in non-shift daytime workers. *Sleep*. 2002;25(3):315-22.  
49  
50  
51  
52  
53  
54  
55  
56  
57  
58  
59  
60

- 1  
2  
3 35. Silva EJ, Wang W, Ronda JM, Wyatt JK, Duffy JF. Circadian and wake-dependent  
4 influences on subjective sleepiness, cognitive throughput, and reaction time performance in older  
5 and young adults. *Sleep*. 2010;33(4):481-90.  
6  
7  
8  
9  
10 36. Bioulac S, Franchi JM, Arnaud M, Sagaspe P, Moore N, Salvo F, et al. Risk of Motor  
11 Vehicle Accidents Related to Sleepiness at the Wheel: A Systematic Review and Meta-Analysis.  
12 *Sleep*. 2017;40(10).  
13  
14  
15  
16  
17 37. Rosenwasser AM. Chronobiology of ethanol: animal models. *Alcohol*. 2015;49(4):311-9.  
18  
19 38. Paparrigopoulos T, Melissaki A, Tsekou H, Efthymiou A, Kribeni G, Baziotis N, et al.  
20 Melatonin secretion after head injury: a pilot study. *Brain injury*. 2006;20(8):873-8.  
21  
22  
23  
24 39. Seifman MA, Adamides AA, Nguyen PN, Vallance SA, Cooper DJ, Kossmann T, et al.  
25 Endogenous melatonin increases in cerebrospinal fluid of patients after severe traumatic brain  
26 injury and correlates with oxidative stress and metabolic disarray. *Journal of Cerebral Blood*  
27 *Flow and Metabolism*. 2008;28(4):684-96.  
28  
29  
30  
31  
32  
33 40. Guaraldi P, Sancisi E, La Morgia C, Calandra-Buonaura G, Carelli V, Cameli O, et al.  
34 Nocturnal melatonin regulation in post-traumatic vegetative state: a possible role for melatonin  
35 supplementation? *Chronobiology international*. 2014;31(5):741-5.  
36  
37  
38  
39  
40 41. Steele DL, Rajaratnam SM, Redman JR, Ponsford JL. The effect of traumatic brain injury  
41 on the timing of sleep. *Chronobiology international*. 2005;22(1):89-105.  
42  
43  
44  
45 42. Shekleton JA, Parcell DL, Redman JR, Phipps-Nelson J, Ponsford JL, Rajaratnam SM.  
46 Sleep disturbance and melatonin levels following traumatic brain injury. *Neurology*.  
47 2010;74(21):1732-8.  
48  
49  
50  
51  
52  
53  
54  
55  
56  
57  
58  
59  
60

Table 1. *Key Features of the Circadian Rhythm Sleep-Wake Disorders Diagnosed in this Study*

| <b>Circadian Disorder</b>         | <b>Characteristic sleep pattern</b>                                                                                 | <b>Main clinical features</b>                                                                                                                                                                                                                                                                                                   | <b>Epidemiology</b>                                                                                                                                                                                                  | <b>Treatment</b>                                                                                                                                                                                                       |
|-----------------------------------|---------------------------------------------------------------------------------------------------------------------|---------------------------------------------------------------------------------------------------------------------------------------------------------------------------------------------------------------------------------------------------------------------------------------------------------------------------------|----------------------------------------------------------------------------------------------------------------------------------------------------------------------------------------------------------------------|------------------------------------------------------------------------------------------------------------------------------------------------------------------------------------------------------------------------|
| Delayed sleep-wake phase disorder | Delayed main sleep episode (usually by at least two hours) relative to the socially desired or required sleep time. | <ul style="list-style-type: none"> <li>• Sleep initiation insomnia and difficulty with waking when sleep schedule is socially imposed, but significantly improved sleep when sleep schedule is freely chosen.</li> <li>• Excessive sleepiness in the morning.</li> <li>• Risk for the development of mood disorders.</li> </ul> | <ul style="list-style-type: none"> <li>• Usually starts in adolescence.</li> <li>• Prevalence in general population: 0.17% - 1.53%</li> <li>• 5-10% of individuals with chronic insomnia in sleep clinics</li> </ul> | <ul style="list-style-type: none"> <li>• Strategically timed oral melatonin based on DLMO<sup>c,ad,a</sup></li> <li>• Post-awakening light therapy in conjunction with behavioral treatment <sup>c,ad</sup></li> </ul> |

1  
2  
3  
4  
5  
6  
7  
8  
9  
10  
11  
12  
13  
14  
15  
16  
17  
18  
19  
20  
21  
22  
23  
24  
25  
26  
27  
28  
29  
30  
31  
32  
33  
34  
35  
36  
37  
38  
39  
40  
41  
42  
43  
44  
45  
46  
47

|                                                                                       |                                                                                                                                                                                                                             |                                                                                                                                                                                                                                                                                                                   |                                                                                                                                                                                                                                                                                                                                                                             |                                                                                                                                                                      |
|---------------------------------------------------------------------------------------|-----------------------------------------------------------------------------------------------------------------------------------------------------------------------------------------------------------------------------|-------------------------------------------------------------------------------------------------------------------------------------------------------------------------------------------------------------------------------------------------------------------------------------------------------------------|-----------------------------------------------------------------------------------------------------------------------------------------------------------------------------------------------------------------------------------------------------------------------------------------------------------------------------------------------------------------------------|----------------------------------------------------------------------------------------------------------------------------------------------------------------------|
| <p>Advanced sleep-wake phase disorder</p> <p>Irregular sleep-wake rhythm disorder</p> | <p>Advanced main sleep episode (at least by two hours) relative to the socially desired or required sleep time</p> <p>Irregular sleep episodes typically shorter than 4 hours; total 24 h sleep duration can be normal.</p> | <ul style="list-style-type: none"> <li>Inability to stay awake until the socially desirable time in the evening and inability to remain asleep until a socially desirable wake time.</li> <li>Excessive sleepiness in the evening.</li> <li>Insomnia at night and excessive sleepiness during the day.</li> </ul> | <ul style="list-style-type: none"> <li>Approximately 1% of the general population has advanced sleep phase</li> <li>Prevalence of advanced sleep-wake phase disorder in the general population and in sleep clinic insomnia samples is unknown but thought to be rare.</li> <li>Described in neuro-developmental and neuro-degenerative disorders and after TBI.</li> </ul> | <ul style="list-style-type: none"> <li>Evening light therapy</li> <li>Light therapy in elderly patients with dementia</li> <li>Melatonin <sup>c, ad</sup></li> </ul> |
|---------------------------------------------------------------------------------------|-----------------------------------------------------------------------------------------------------------------------------------------------------------------------------------------------------------------------------|-------------------------------------------------------------------------------------------------------------------------------------------------------------------------------------------------------------------------------------------------------------------------------------------------------------------|-----------------------------------------------------------------------------------------------------------------------------------------------------------------------------------------------------------------------------------------------------------------------------------------------------------------------------------------------------------------------------|----------------------------------------------------------------------------------------------------------------------------------------------------------------------|

Note: TBI: traumatic brain injury; DLMO: dim light melatonin onset; c: children; ad: adolescents; a: adults

Table 2. *Participant Characteristics*

|                                        | No (%)  | Median (IQR)                                   | Min-max |
|----------------------------------------|---------|------------------------------------------------|---------|
| <b>Age (years)</b>                     |         | 39.5 (23.8)                                    | 17- 62  |
|                                        |         | <a href="#">25<sup>th</sup> percentile: 28</a> |         |
|                                        |         | <a href="#">75<sup>th</sup> percentile: 51</a> |         |
| <b>Gender</b>                          |         |                                                |         |
| Male                                   | 18 (36) |                                                |         |
| Female                                 | 32 (64) |                                                |         |
| <b>Education</b>                       |         |                                                |         |
| High school                            | 13 (26) |                                                |         |
| College                                | 12 (24) |                                                |         |
| University                             | 25 (50) |                                                |         |
| <b>Employment status</b>               |         |                                                |         |
| Full time                              | 21 (42) |                                                |         |
| Part time                              | 5 (10)  |                                                |         |
| Student                                | 4 (8)   |                                                |         |
| Unemployed                             | 8 (16)  |                                                |         |
| Sick leave/disability                  | 11(22)  |                                                |         |
| Retired                                | 1 (2)   |                                                |         |
| <b>Number of concussions</b>           |         |                                                |         |
| Single                                 | 32 (64) |                                                |         |
| Multiple                               | 18 (36) |                                                |         |
| <b>Time since the injury*</b> (months) |         | 11.5 (12)                                      | 3 - 27  |
|                                        |         | <a href="#">25<sup>th</sup> percentile: 8</a>  |         |
|                                        |         | <a href="#">75<sup>th</sup> percentile: 20</a> |         |

Table 2. *Participant Characteristics (continued from previous page)*

|                                                                                     | No (%)  | Median (IQR) | Min-max |
|-------------------------------------------------------------------------------------|---------|--------------|---------|
| <b>Cause of injury</b>                                                              |         |              |         |
| Car accident                                                                        | 18 (36) |              |         |
| Sport injury                                                                        | 18 (36) |              |         |
| Fall                                                                                | 9 (18)  |              |         |
| Object hit the head                                                                 | 2 (4)   |              |         |
| Physical assault                                                                    | 2 (4)   |              |         |
| Workplace injury                                                                    | 1 (2)   |              |         |
| <b>Referral source</b>                                                              |         |              |         |
| Head injury clinic                                                                  | 18 (36) |              |         |
| Family medicine clinic                                                              | 16 (32) |              |         |
| Concussion/sport clinic                                                             | 6 (12)  |              |         |
| Sleep clinic                                                                        | 4 (8)   |              |         |
| Speech-language pathologist, neurologist,<br>physiotherapist, emergency specialists | 2 (4)   |              |         |

*Note:* \* Time elapsed since the injury. If a participant had multiple concussions, it is time elapsed since the injury that preceded the onset of the sleep problem. ~~Number of concussions: includes the one that preceded the sleep problem.~~ IQR = interquartile range



Table 3. *Circadian Rhythm Sleep-Wake Disorder Diagnoses*

|                                     | ASWPD         | DSWPD           | ISWRD         | No CRSWD        |
|-------------------------------------|---------------|-----------------|---------------|-----------------|
| In the full sample (n = 50)         | <u>4 ± 5%</u> | <u>20 ± 11%</u> | <u>2 ± 4%</u> | <u>74 ± 12%</u> |
| In participants ≤ 31 years (n = 16) | <u>0%</u>     | <u>50 ± 25%</u> | <u>0%</u>     | <u>50 ± 25%</u> |
| In participants > 31 years (n = 34) | <u>6 ± 8%</u> | <u>3 ± 6%</u>   | <u>3 ± 6%</u> | <u>88 ± 11%</u> |

*Note:* Data represent the prevalence in percentages ± 95% CI. ASWPD = advanced sleep-wake phase disorder, DSWPD = delayed sleep-wake phase disorder, ISWRD = irregular sleep-wake rhythm disorder, CRSWD = circadian rhythm sleep-wake disorder

1  
2  
3  
4  
5  
6  
7  
8  
9  
10  
11  
12  
13  
14  
15  
16  
17  
18  
19  
20  
21  
22  
23  
24  
25  
26  
27  
28  
29  
30  
31  
32  
33  
34  
35  
36  
37  
38  
39  
40  
41  
42  
43  
44  
45  
46  
47

Table 4. Age, Gender and Employment Status of Participants without a Circadian Rhythm Sleep-Wake Disorder and Participants with Delayed Phase Sleep Wake Disorder

|                              | <u>Without CRSWD (N = 37)</u> |                                                                                 |                           | <u>DPSWD (N = 10)</u> |                                                                                   |                           |
|------------------------------|-------------------------------|---------------------------------------------------------------------------------|---------------------------|-----------------------|-----------------------------------------------------------------------------------|---------------------------|
|                              | <u>No (%)</u>                 | <u>Median</u><br><u>(IQR)</u>                                                   | <u>Min-</u><br><u>max</u> | <u>No (%)</u>         | <u>Median</u><br><u>(IQR)</u>                                                     | <u>Min-</u><br><u>max</u> |
| <u>Age (years)</u>           |                               | 40 (23.5)<br>25 <sup>th</sup> percentile: 31<br>75 <sup>th</sup> percentile: 54 | 17 -<br>62                |                       | 26 (11)<br>25 <sup>th</sup> percentile:<br>20.5<br>75 <sup>th</sup> percentile:30 | 17 - 54                   |
| <u>Gender</u>                |                               |                                                                                 |                           |                       |                                                                                   |                           |
| <u>Male</u>                  | 18 (36)                       |                                                                                 |                           | 5 (50)                |                                                                                   |                           |
| <u>Female</u>                | 32 (64)                       |                                                                                 |                           | 5 (50)                |                                                                                   |                           |
| <u>Employment status</u>     |                               |                                                                                 |                           |                       |                                                                                   |                           |
| <u>Full time</u>             | 17 (46)                       |                                                                                 |                           | 3 (30)                |                                                                                   |                           |
| <u>Part time</u>             | 2 (5)                         |                                                                                 |                           | 2 (20)                |                                                                                   |                           |
| <u>Student</u>               | 3 (8)                         |                                                                                 |                           | 1 (10)                |                                                                                   |                           |
| <u>Unemployed</u>            | 5 (14)                        |                                                                                 |                           | 3 (30)                |                                                                                   |                           |
| <u>Sick leave/disability</u> | 9 (24)                        |                                                                                 |                           | 1 (10)                |                                                                                   |                           |
| <u>Retired</u>               | 1 (3)                         |                                                                                 |                           | 0 (0)                 |                                                                                   |                           |

Confidential

Table 45. *DLMO and Sleep Timing*

|                         | No CRSWD (n = 37) |                           | DSWPD<br>(n = 10) |                           | Effect sizes (r) |
|-------------------------|-------------------|---------------------------|-------------------|---------------------------|------------------|
|                         | Mean (SD)         | 95% BCa CI of<br>the Mean | Mean (SD)         | 95% BCa CI of the<br>Mean |                  |
| DLMO                    | 20:24 (1.8)*      | 20:06 – 20:40             | 22:73 (0.63)*     | 22:18 – 23:18             | .73              |
| Bedtime                 | 23:34 (0.8)*      | 23:17 - 23:50             | 24:55 (1.0) *     | 24:19 – 25:40             | .58              |
| Sleep onset time        | 24: 17 (0.9)*     | 24:01 – 24: 39            | 02:00 (1.0)*      | 01:26 – 02:36             | .63              |
| Sleep midpoint          | 03:50 (.53)*      | 03:41 - 04:03             | 05:20 (1.3)*      | 04:32 – 06:06             | .81              |
| Wake time               | 7:21 (0.5)*       | 7:14 – 7:34               | 8:41 (1.9)*       | 7:30 – 9:45               | .73              |
| Getting out of bed time | 8:02 (0.6)*       | 7:53 – 8.18               | 9:41 (1.8)*       | 8:29 – 10:47              | .80              |

*Note:* 95 BCa CI = 95% bias corrected accelerated confidence interval based on 1000 bootstrapping samples. \* denotes statistically significant differences between the groups.

Time is in the International Organization for Standardization (ISO) 8601 format

1  
2  
3  
4  
5  
6  
7  
8  
9  
10  
11  
12  
13  
14  
15  
16  
17  
18  
19  
20  
21  
22  
23  
24  
25  
26  
27  
28  
29  
30  
31  
32  
33  
34  
35  
36  
37  
38  
39  
40  
41  
42  
43  
44  
45  
46  
47  
48  
49  
50  
51  
52  
53  
54  
55  
56  
57  
58  
59  
60

Figure 1. *Participant Flow*



Confidential

STROBE Statement—Checklist of items that should be included in reports of *cross-sectional studies*

|                              | Item No | Recommendation                                                                                                                                                                                    | Page No               |
|------------------------------|---------|---------------------------------------------------------------------------------------------------------------------------------------------------------------------------------------------------|-----------------------|
| <b>Title and abstract</b>    | 1       | (a) Indicate the study's design with a commonly used term in the title or the abstract                                                                                                            | 1                     |
|                              |         | (b) Provide in the abstract an informative and balanced summary of what was done and what was found                                                                                               | 2                     |
| <b>Introduction</b>          |         |                                                                                                                                                                                                   |                       |
| Background/rationale         | 2       | Explain the scientific background and rationale for the investigation being reported                                                                                                              | 4-5                   |
| Objectives                   | 3       | State specific objectives, including any prespecified hypotheses                                                                                                                                  | 5                     |
| <b>Methods</b>               |         |                                                                                                                                                                                                   |                       |
| Study design                 | 4       | Present key elements of study design early in the paper                                                                                                                                           | 6                     |
| Setting                      | 5       | Describe the setting, locations, and relevant dates, including periods of recruitment, exposure, follow-up, and data collection                                                                   | 6                     |
| Participants                 | 6       | (a) Give the eligibility criteria, and the sources and methods of selection of participants                                                                                                       | 6-7                   |
| Variables                    | 7       | Clearly define all outcomes, exposures, predictors, potential confounders, and effect modifiers. Give diagnostic criteria, if applicable                                                          | 5,9                   |
| Data sources/<br>measurement | 8*      | For each variable of interest, give sources of data and details of methods of assessment (measurement). Describe comparability of assessment methods if there is more than one group              | 7-8                   |
| Bias                         | 9       | Describe any efforts to address potential sources of bias                                                                                                                                         | response to reviewers |
| Study size                   | 10      | Explain how the study size was arrived at                                                                                                                                                         | 6                     |
| Quantitative variables       | 11      | Explain how quantitative variables were handled in the analyses. If applicable, describe which groupings were chosen and why                                                                      | 8-9                   |
| Statistical methods          | 12      | (a) Describe all statistical methods, including those used to control for confounding                                                                                                             | 9                     |
|                              |         | (b) Describe any methods used to examine subgroups and interactions                                                                                                                               | 9                     |
|                              |         | (c) Explain how missing data were addressed                                                                                                                                                       | 8                     |
|                              |         | (d) If applicable, describe analytical methods taking account of sampling strategy                                                                                                                |                       |
|                              |         | (e) Describe any sensitivity analyses                                                                                                                                                             |                       |
| <b>Results</b>               |         |                                                                                                                                                                                                   |                       |
| Participants                 | 13*     | (a) Report numbers of individuals at each stage of study—eg numbers potentially eligible, examined for eligibility, confirmed eligible, included in the study, completing follow-up, and analysed | 6, 30                 |
|                              |         | (b) Give reasons for non-participation at each stage                                                                                                                                              | 30                    |
|                              |         | (c) Consider use of a flow diagram                                                                                                                                                                | 30                    |
| Descriptive data             | 14*     | (a) Give characteristics of study participants (eg demographic, clinical, social) and information on exposures and potential confounders                                                          | 25-26                 |
|                              |         | (b) Indicate number of participants with missing data for each variable of interest                                                                                                               | 8                     |
| Outcome data                 | 15*     | Report numbers of outcome events or summary measures                                                                                                                                              | 9-10<br>27            |

1  
2  
3  
4  
5  
6  
7  
8  
9  
10  
11  
12  
13  
14  
15  
16  
17  
18  
19  
20  
21  
22  
23  
24  
25  
26  
27  
28  
29  
30  
31  
32  
33  
34  
35  
36  
37  
38  
39  
40  
41  
42  
43  
44  
45  
46  
47  
48  
49  
50  
51  
52  
53  
54  
55  
56  
57  
58  
59  
60

|                          |    |                                                                                                                                                                                                              |                |
|--------------------------|----|--------------------------------------------------------------------------------------------------------------------------------------------------------------------------------------------------------------|----------------|
| Main results             | 16 | (a) Give unadjusted estimates and, if applicable, confounder-adjusted estimates and their precision (eg, 95% confidence interval). Make clear which confounders were adjusted for and why they were included | 9, 27          |
|                          |    | (b) Report category boundaries when continuous variables were categorized                                                                                                                                    | N/A            |
|                          |    | (c) If relevant, consider translating estimates of relative risk into absolute risk for a meaningful time period                                                                                             | N/A            |
| Other analyses           | 17 | Report other analyses done—eg analyses of subgroups and interactions, and sensitivity analyses                                                                                                               | 10, 28-29      |
| <b>Discussion</b>        |    |                                                                                                                                                                                                              |                |
| Key results              | 18 | Summarise key results with reference to study objectives                                                                                                                                                     | 10             |
| Limitations              | 19 | Discuss limitations of the study, taking into account sources of potential bias or imprecision. Discuss both direction and magnitude of any potential bias                                                   | 13-15          |
| Interpretation           | 20 | Give a cautious overall interpretation of results considering objectives, limitations, multiplicity of analyses, results from similar studies, and other relevant evidence                                   | 10-12<br>14-15 |
| Generalisability         | 21 | Discuss the generalisability (external validity) of the study results                                                                                                                                        | 13             |
| <b>Other information</b> |    |                                                                                                                                                                                                              |                |
| Funding                  | 22 | Give the source of funding and the role of the funders for the present study and, if applicable, for the original study on which the present article is based                                                | 1              |

\*Give information separately for exposed and unexposed groups.

**Note:** An Explanation and Elaboration article discusses each checklist item and gives methodological background and published examples of transparent reporting. The STROBE checklist is best used in conjunction with this article (freely available on the Web sites of PLoS Medicine at <http://www.plosmedicine.org/>, Annals of Internal Medicine at <http://www.annals.org/>, and Epidemiology at <http://www.epidem.com/>). Information on the STROBE Initiative is available at [www.strobe-statement.org](http://www.strobe-statement.org).
